# Supplementary material
Source: PubMed Central journal article supplement (PMC1182321)

A

Rab1A  
Rab1B  
Rab1C/Rab35  
Rab2  
Rab2B  
Rab3A  
Rab3B  
Rab3C  
Rab3D  
Rab4A  
Rab4B  
Rab4C  
Rab4D  
Rab5A  
Rab5B  
Rab5C  
Rab6  
Rab7  
Rab8A  
Rab8B  
Rab9  
Rab10  
Rab11A  
Rab11B  
Rab12  
Rab13  
Rab14  
Rab15  
Rab17  
Rab18  
Rab19  
Rab20  
Rab21  
Rab22A  
Rab23  
Rab24  
Rab25  
Rab26  
Rab27A  
Rab28  
Rab30  
Rab31  
Rab32  
Rab33A  
Rab33B  
Rab34  
Rab36  
Rab37  
Rab38  
Rab39  
Rab39B  
Rab40C

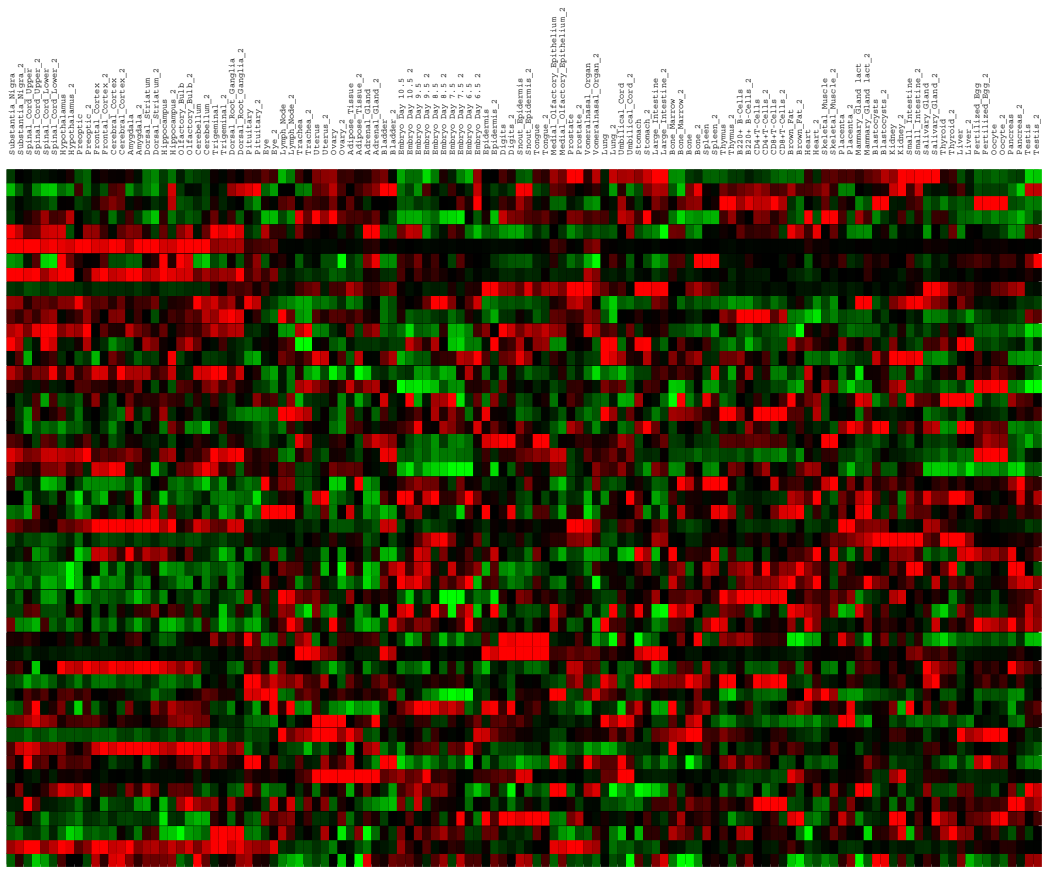

B

Rab4B  
Rab24  
Rab1B  
Rab40C  
Rab2  
Rab10  
Rab7  
Rab5A  
Rab11A  
Rab11B  
Rab28  
Rab33B  
Rab2B  
Rab34  
Rab31  
Rab5B  
Rab8A  
Rab4A  
Rab36  
Rab3A  
Rab3C  
Rab39B  
Rab15  
Rab26  
Rab6  
Rab33A  
Rab1A  
Rab9  
Rab17  
Rab3D  
Rab25  
Rab3B  
Rab5C  
Rab32  
Rab1C/Rab35  
Rab3B  
Rab18  
Rab22A  
Rab30  
Rab12  
Rab14  
Rab13  
Rab20  
Rab19  
Rab23  
Rab8B  
Rab21  
Rab27A  
Rab37  
Rab39

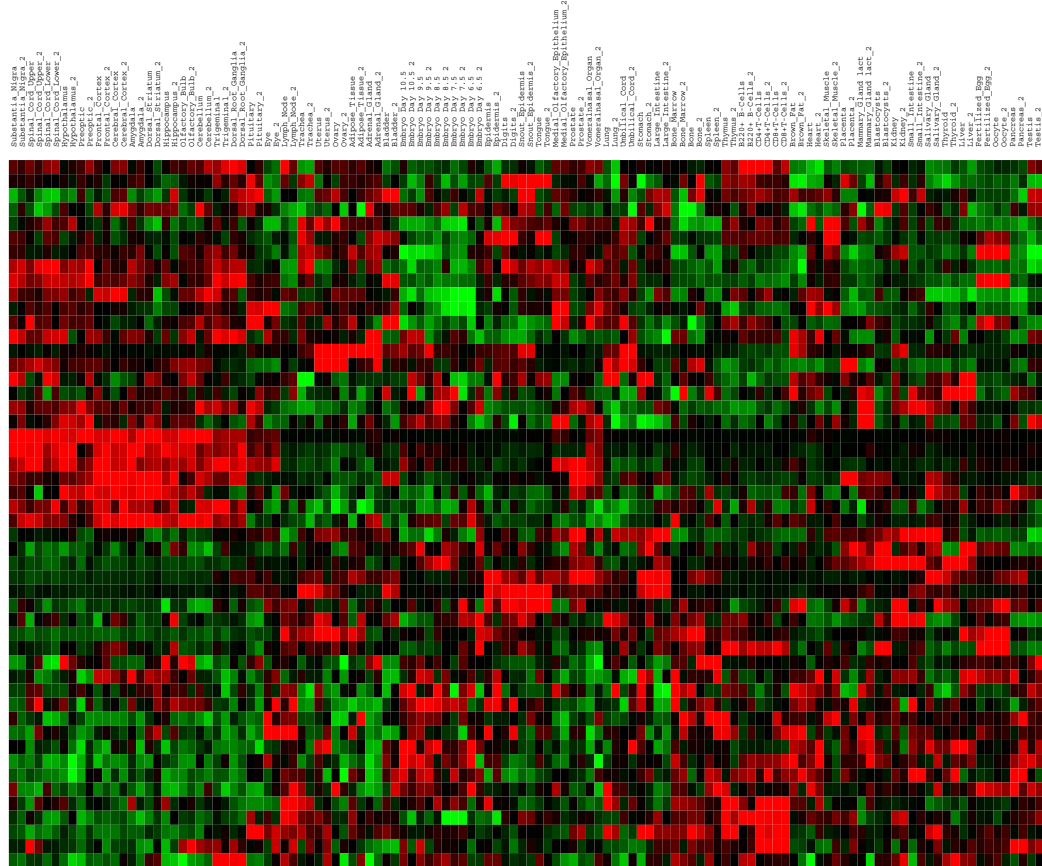

C

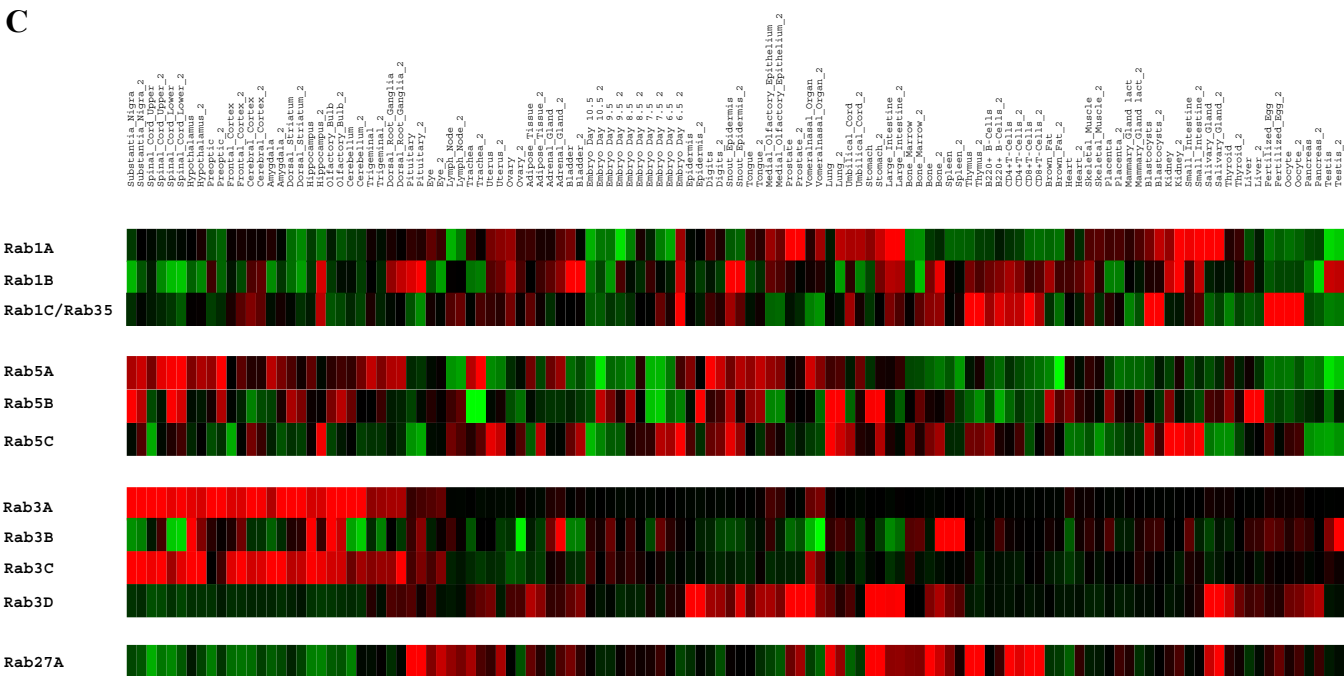

Figure S2 - Gurkan *et al*

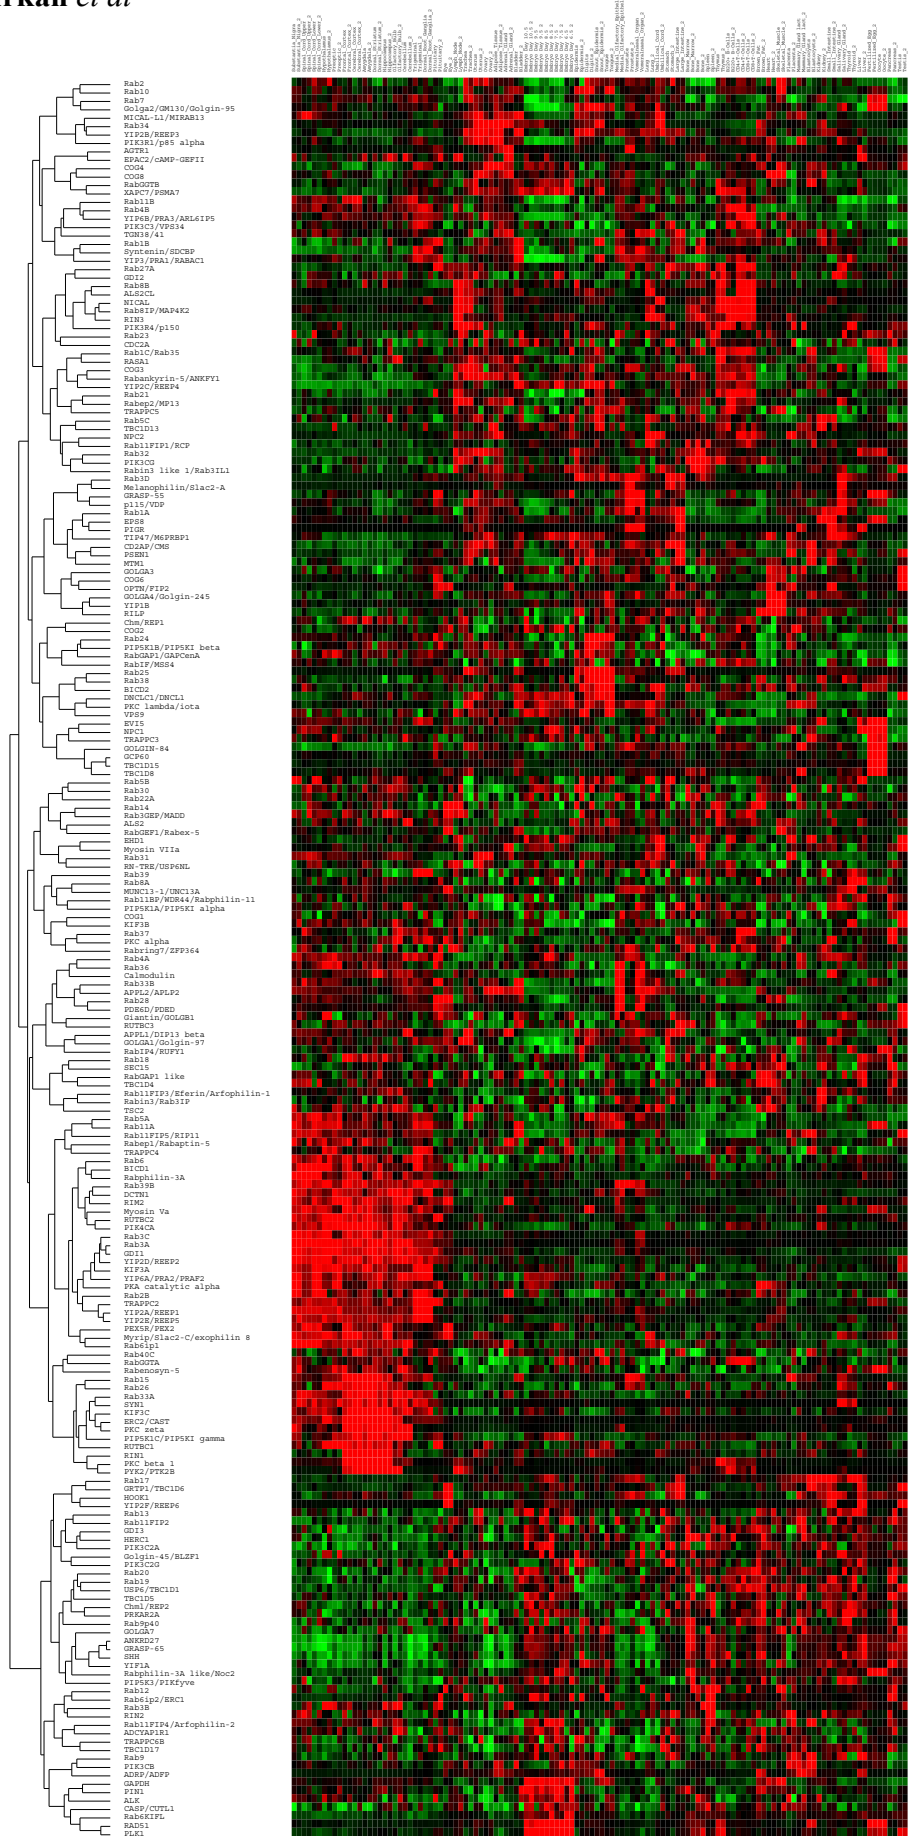



Figure S4 - Gurkan *et al*

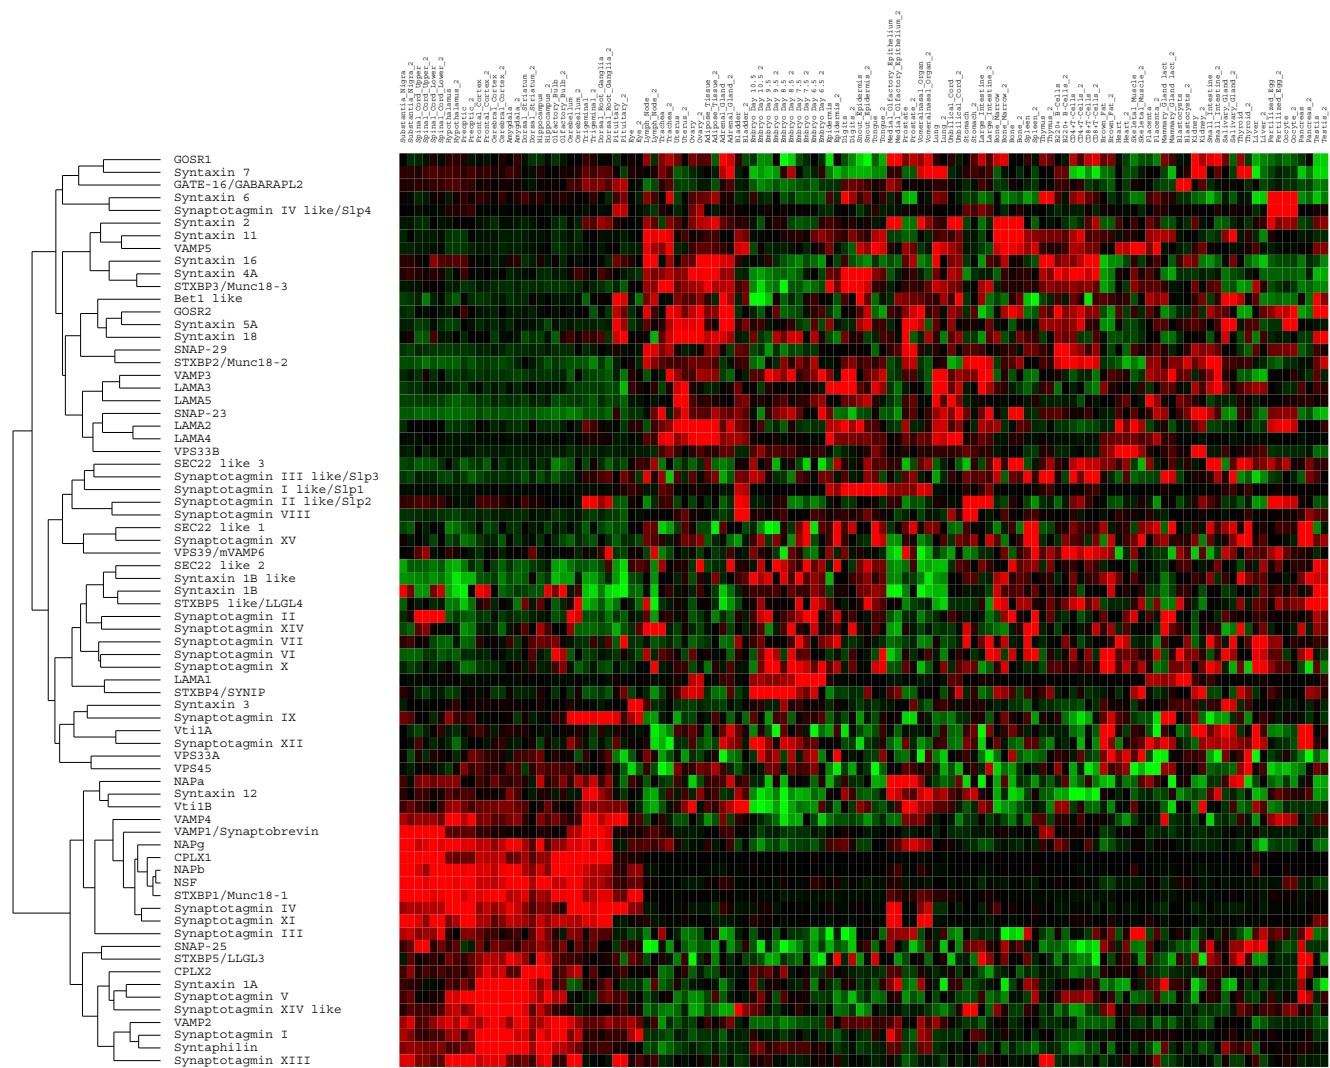

Figure S5 - Gurkan *et al*

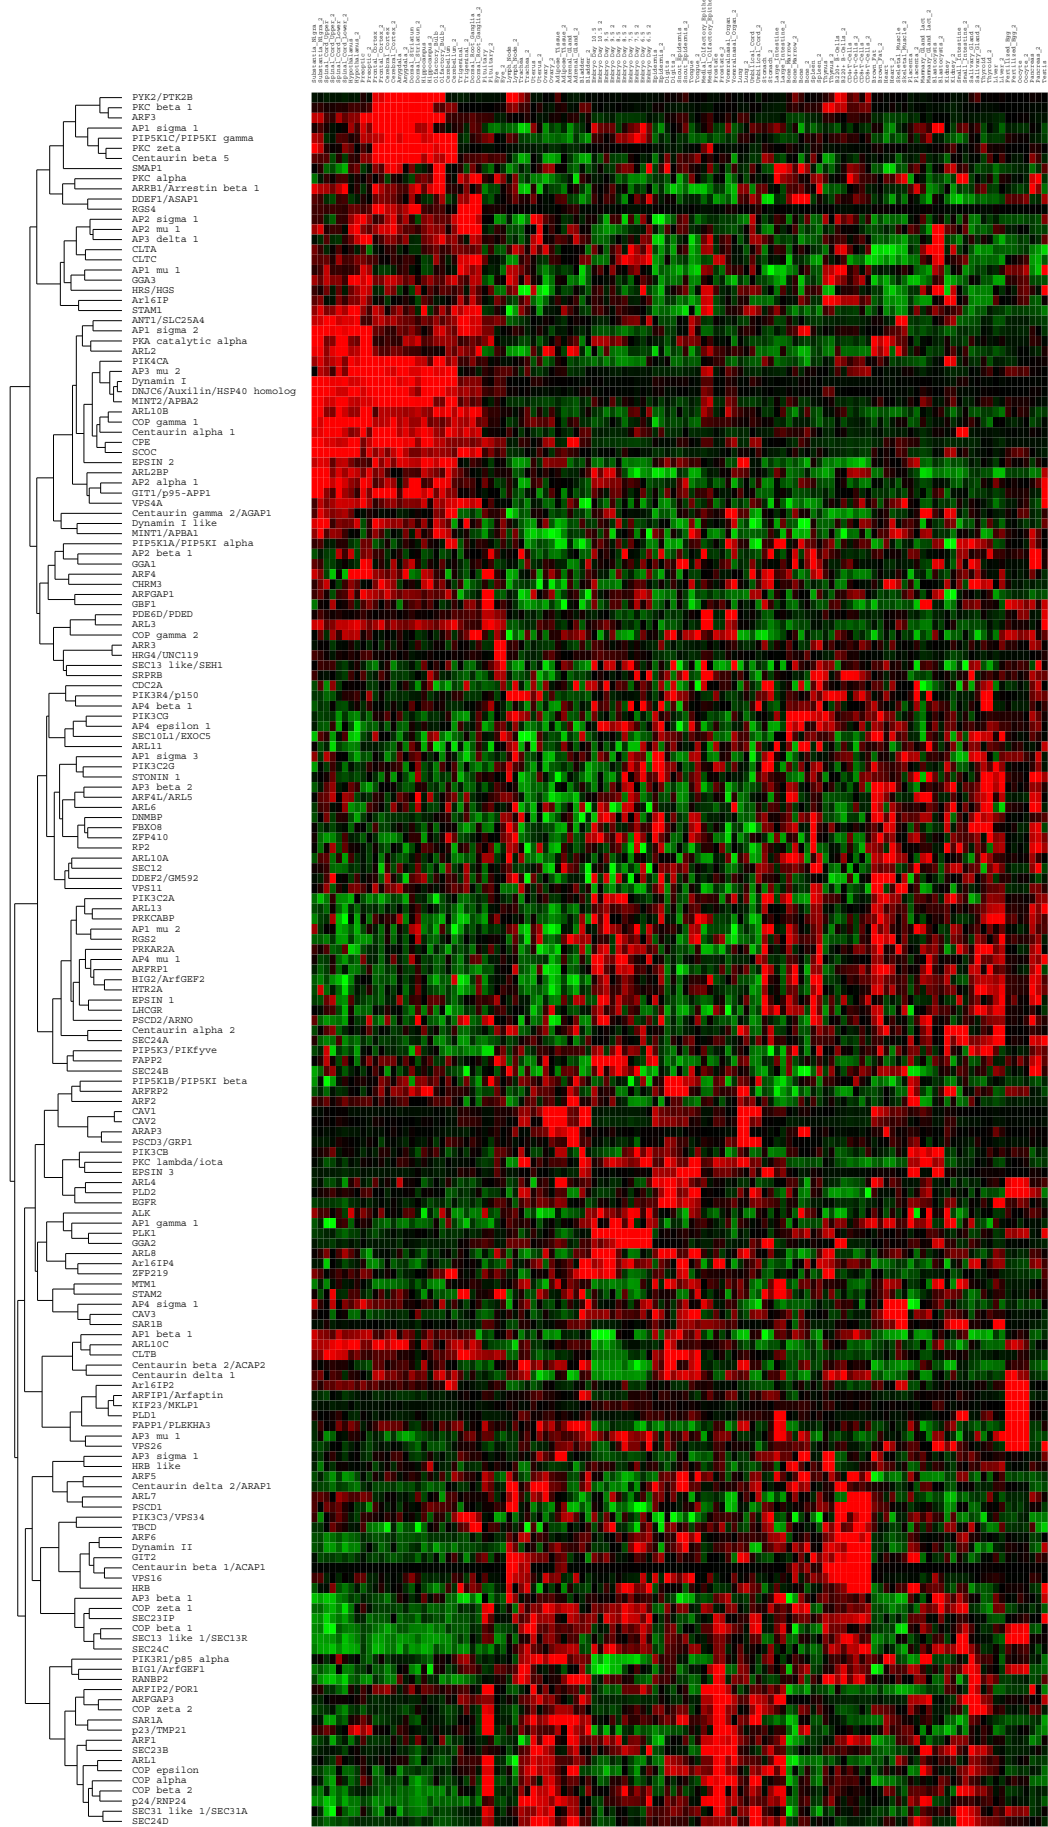



Figure S7 - Gurkan *et al*

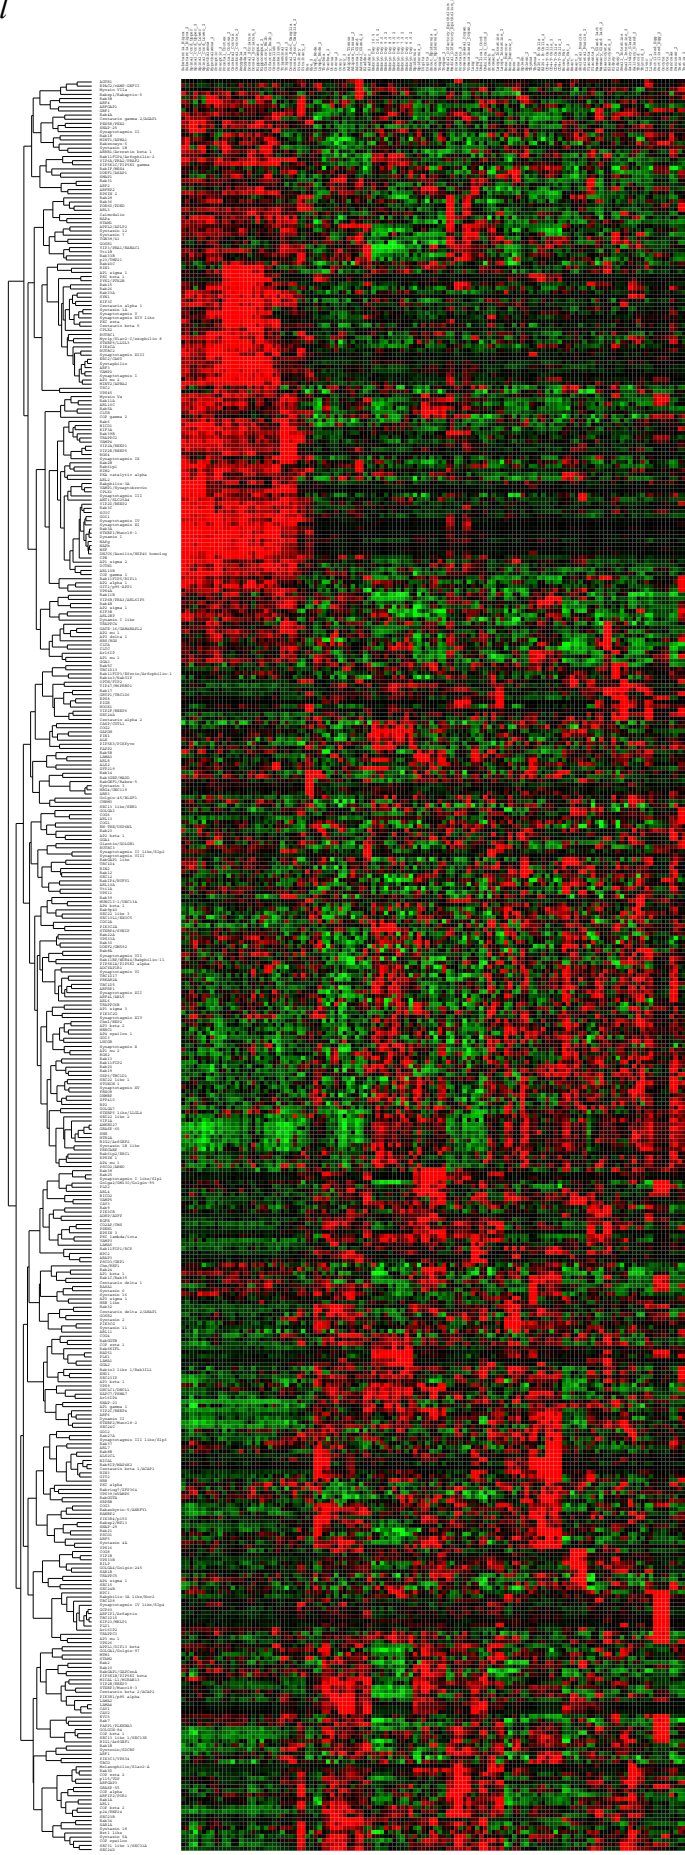

Supplement: mbc_E05-01-0062_2.pdf [file mbc_E05-01-0062_2.pdf]
