# Supplementary material
Source: PubMed Central journal article supplement (PMC1182321)
Supplement: mbc_E05-01-0062_3.pdf [file mbc_E05-01-0062_3.pdf]

## Human membrane genes and the corresponding GNF probesets

| Gene/Protein            | Accession number | Probe Set     | Class                    |
|-------------------------|------------------|---------------|--------------------------|
| Rab1A                   | NM_004161        | 207791_s_at   | Rabs                     |
| Rab1B                   | NM_030981        | 220964_s_at   | Rabs                     |
| Rab1C/Rab35             | NM_006861        | 221819_at     | Rabs                     |
| Rab2A                   | NM_002865        | 208733_at     | Rabs                     |
| Rab2B                   | NM_032846        | NM_032846_at  | Rabs                     |
| Rab3A                   | NM_002866        | 204974_at     | Rabs                     |
| Rab3B                   | NM_002867        | 205924_at     | Rabs                     |
| Rab3C                   | NM_138453        | en265039_s_at | Rabs                     |
| Rab3D/Rab16             | NM_004283        | 208466_at     | Rabs                     |
| Rab4A                   | NM_004578        | 203581_at     | Rabs                     |
| Rab4B                   | NM_016154        | 219807_x_at   | Rabs                     |
| Rab5A                   | NM_004162        | 209089_at     | Rabs                     |
| Rab5B                   | NM_002868        | 201276_at     | Rabs                     |
| Rab5C                   | NM_004583        | 201140_s_at   | Rabs                     |
| Rab6A                   | NM_002869        | 201047_x_at   | Rabs                     |
| Rab6B                   | NM_016577        | 210127_at     | Rabs                     |
| Rab6C                   | NM_032144        | 210406_s_at   | Rabs                     |
| Rab7                    | NM_004637        | 211961_s_at   | Rabs                     |
| Rab8A                   | NM_005370        | 208819_at     | Rabs                     |
| Rab8B                   | NM_016530        | 219210_s_at   | Rabs                     |
| Rab9A                   | NM_004251        | 221808_at     | Rabs                     |
| Rab10                   | NM_016131        | NM_016131_at  | Rabs                     |
| Rab11A                  | NM_004663        | 200863_s_at   | Rabs                     |
| Rab11B                  | NM_004218        | 217793_at     | Rabs                     |
| Rab13                   | NM_002870        | 202252_at     | Rabs                     |
| Rab14                   | NM_016322        | 200928_s_at   | Rabs                     |
| Rab15                   | NM_198686        | en267512_at   | Rabs                     |
| Rab17                   | NM_022449        | 218931_at     | Rabs                     |
| Rab19                   | NM_001008749     | en275874_s_at | Rabs                     |
| Rab20                   | NM_017817        | 219622_at     | Rabs                     |
| Rab21                   | NM_014999        | 203885_at     | Rabs                     |
| Rab22A                  | NM_020673        | 218360_at     | Rabs                     |
| Rab22B/Rab31            | NM_006868        | 217762_s_at   | Rabs                     |
| Rab23                   | NM_016277        | 220955_x_at   | Rabs                     |
| Rab25                   | NM_020387        | 218186_at     | Rabs                     |
| Rab26                   | NM_014353        | 219562_at     | Rabs                     |
| Rab27A                  | NM_004580        | 209515_s_at   | Rabs                     |
| Rab27B                  | NM_004163        | 207018_s_at   | Rabs                     |
| Rab28                   | NM_004249        | 207495_at     | Rabs                     |
| Rab29/Rab7L1            | NM_003929        | 218699_at     | Rabs                     |
| Rab30                   | NM_014488        | 206530_at     | Rabs                     |
| Rab32                   | NM_006834        | 204214_s_at   | Rabs                     |
| Rab33A                  | NM_004794        | 206039_at     | Rabs                     |
| Rab33B                  | NM_031296        | 221014_s_at   | Rabs                     |
| Rab34/Rab39             | NM_031934        | NM_031934_at  | Rabs                     |
| Rab36                   | NM_004914        | 211471_s_at   | Rabs                     |
| Rab38                   | NM_022337        | 219412_at     | Rabs                     |
| Rab40A                  | NM_080879        | 215782_at     | Rabs                     |
| Rab40B                  | NM_006822        | 204547_at     | Rabs                     |
| Rab40C                  | NM_021168        | NM_053284_at  | Rabs                     |
| Rab43/Rab41             | NM_198490        | en265053_at   | Rabs                     |
| AGTR1                   | NM_000685        | 205357_s_at   | Rab Regulators/Effectors |
| ALS1                    | NM_000454        | 200642_at     | Rab Regulators/Effectors |
| ALS2                    | NM_020919        | NM_020919_at  | Rab Regulators/Effectors |
| ALS2CL                  | NM_147129        | 222333_at     | Rab Regulators/Effectors |
| ANKRD27                 | NM_032139        | 221522_at     | Rab Regulators/Effectors |
| APPL1                   | NM_012096        | 218158_s_at   | Rab Regulators/Effectors |
| APPL2/APLP2             | NM_001642        | 208248_x_at   | Rab Regulators/Effectors |
| Bet3                    | NM_014408        | 203511_s_at   | Rab Regulators/Effectors |
| BICD1                   | NM_001003398     | 204741_at     | Rab Regulators/Effectors |
| BICD2                   | NM_001003800     | 209203_s_at   | Rab Regulators/Effectors |
| Calmodulin              | NM_006888        | 200653_s_at   | Rab Regulators/Effectors |
| CASP/CUTL1              | NM_001913        | 202367_at     | Rab Regulators/Effectors |
| CHM/REP1                | NM_000390        | 207099_s_at   | Rab Regulators/Effectors |
| CHM/REP2                | NM_001821        | 206079_at     | Rab Regulators/Effectors |
| COG2                    | NM_007357        | 203073_at     | Rab Regulators/Effectors |
| COG4                    | NM_015386        | 212189_s_at   | Rab Regulators/Effectors |
| COG5                    | NM_006348        | 203630_s_at   | Rab Regulators/Effectors |
| COG7                    | NM_153603        | 213190_at     | Rab Regulators/Effectors |
| DCTN1                   | NM_004082        | 201082_s_at   | Rab Regulators/Effectors |
| DNCL1                   | NM_003746        | 200703_at     | Rab Regulators/Effectors |
| EAA1                    | NM_003566        | 204841_s_at   | Rab Regulators/Effectors |
| EHD1                    | NM_006795        | 208112_x_at   | Rab Regulators/Effectors |
| EPAC2/cAMP-GEFII        | NM_007023        | 205651_x_at   | Rab Regulators/Effectors |
| EPS8                    | NM_004447        | 202609_at     | Rab Regulators/Effectors |
| ERC2/CAST               | NM_015576        | 213938_at     | Rab Regulators/Effectors |
| Exophilin 5/Slac2-B     | NM_015065        | 214734_at     | Rab Regulators/Effectors |
| GAPDH                   | NM_002046        | 212581_x_at   | Rab Regulators/Effectors |
| GDI1                    | NM_001493        | 201864_at     | Rab Regulators/Effectors |
| GDI2                    | NM_001494        | 200008_s_at   | Rab Regulators/Effectors |
| Golga2/GMI130/Golgin-95 | NM_004486        | 204384_at     | Rab Regulators/Effectors |
| GMAP-210/TRIP11         | NM_004239        | 209778_at     | Rab Regulators/Effectors |
| Golga1/Golgin-97        | NM_002077        | 203383_s_at   | Rab Regulators/Effectors |
| Golga3/GCP170           | NM_005895        | 202106_at     | Rab Regulators/Effectors |
| Golga4/Golgin-245       | NM_002078        | 201567_s_at   | Rab Regulators/Effectors |
| Golga5/Golgin-67        | NM_015003        | 208797_s_at   | Rab Regulators/Effectors |
| Golga7                  | NM_016099        | 217819_at     | Rab Regulators/Effectors |
| Giantin/Golgb1          | NM_004487        | 201056_at     | Rab Regulators/Effectors |
| Golgin-45/BLZF1         | NM_003666        | 203840_at     | Rab Regulators/Effectors |
| Golgin-84               | NM_005113        | 218241_at     | Rab Regulators/Effectors |
| GRASP-55                | NM_015530        | 208842_s_at   | Rab Regulators/Effectors |
| GRASP-65                | NM_031899        | 215749_s_at   | Rab Regulators/Effectors |
| GRB2                    | NM_002086        | NM_025199_at  | Rab Regulators/Effectors |
| GRTPI/TBC1D6            | NM_024719        | 206712_at     | Rab Regulators/Effectors |

## Human membrane genes and the corresponding GNF probesets

|                               |           |              |                          |
|-------------------------------|-----------|--------------|--------------------------|
| GCP60                         | NM_022735 | 202323_s_at  | Rab Regulators/Effectors |
| HERC1                         | NM_003922 | 218306_s_at  | Rab Regulators/Effectors |
| HOOK1                         | NM_015888 | 219976_at    | Rab Regulators/Effectors |
| KIF3A                         | NM_007054 | 213623_at    | Rab Regulators/Effectors |
| KIF3B                         | NM_004798 | 203943_at    | Rab Regulators/Effectors |
| KIF3C                         | NM_002254 | 203389_at    | Rab Regulators/Effectors |
| Melanophilin/Slac2-A          | NM_024101 | 218211_s_at  | Rab Regulators/Effectors |
| MICAL-like 1/MIRAB13          | NM_033386 | 221779_at    | Rab Regulators/Effectors |
| Myosin VIIA                   | NM_000260 | 208189_s_at  | Rab Regulators/Effectors |
| Myosin VA                     | NM_000259 | 204527_at    | Rab Regulators/Effectors |
| Myrip/Slac2-C                 | NM_015460 | 214156_at    | Rab Regulators/Effectors |
| MUNC13-1/UNC13A               | XM_038604 | 214817_at    | Rab Regulators/Effectors |
| NICAL-1                       | NM_022765 | 218376_s_at  | Rab Regulators/Effectors |
| NPC1                          | NM_000271 | 202679_at    | Rab Regulators/Effectors |
| NPC2                          | NM_006432 | 200701_at    | Rab Regulators/Effectors |
| OPTN/FIP2                     | NM_021980 | 202073_at    | Rab Regulators/Effectors |
| p15                           | NM_003715 | 201832_s_at  | Rab Regulators/Effectors |
| PEX5R                         | NM_016559 | 219642_s_at  | Rab Regulators/Effectors |
| PIGR                          | NM_002644 | 204213_at    | Rab Regulators/Effectors |
| PIN1                          | NM_006221 | 202927_at    | Rab Regulators/Effectors |
| PSEN1                         | NM_000021 | 203460_s_at  | Rab Regulators/Effectors |
| Rab11BP/WDR44/Rabphilin-11    | NM_019045 | 219297_at    | Rab Regulators/Effectors |
| Rab11FIP1/RCP                 | NM_025151 | 219681_s_at  | Rab Regulators/Effectors |
| Rab11FIP2                     | NM_014904 | 203883_s_at  | Rab Regulators/Effectors |
| Rab11FIP3/Eferin/Arfophilin-1 | NM_014700 | 203933_at    | Rab Regulators/Effectors |
| Rab11FIP4/Arfophilin-2        | NM_032932 | NM_032932_at | Rab Regulators/Effectors |
| Rab11FIP5/RIP11               | NM_015470 | 210879_s_at  | Rab Regulators/Effectors |
| Rab3GAP                       | NM_012233 | 212932_at    | Rab Regulators/Effectors |
| RabGAP1 like/TBC1D18          | NM_014857 | 213982_s_at  | Rab Regulators/Effectors |
| Rab3-GAP150                   | NM_012414 | 202372_at    | Rab Regulators/Effectors |
| Rab3GEP/MADD                  | NM_130470 | 210252_s_at  | Rab Regulators/Effectors |
| Rab3IL1/Rabin-3 like          | NM_013401 | 219579_at    | Rab Regulators/Effectors |
| Rabin3/Rab3IP                 | NM_022456 | NM_022456_at | Rab Regulators/Effectors |
| Rab6IP1                       | NM_015213 | 212561_at    | Rab Regulators/Effectors |
| Rab6IP2/ERC1                  | NM_178040 | 215606_s_at  | Rab Regulators/Effectors |
| Rab6KIFL                      | NM_005733 | 218755_at    | Rab Regulators/Effectors |
| Rab8IP/MAP4K2                 | NM_004579 | 204936_at    | Rab Regulators/Effectors |
| Rab9p40                       | NM_005833 | 203150_at    | Rab Regulators/Effectors |
| Rabankyrin-5/ANKFY1           | NM_016376 | 219868_s_at  | Rab Regulators/Effectors |
| Rabaptin-5/Rabep1             | NM_004703 | 203223_at    | Rab Regulators/Effectors |
| Rabconnectin-3 alpha          | NM_015263 | 212820_at    | Rab Regulators/Effectors |
| Rabconnectin-3 beta           | NM_015285 | 212880_at    | Rab Regulators/Effectors |
| Rabenosyn-5                   | NM_022340 | NM_022340_at | Rab Regulators/Effectors |
| Rabep2/MP13                   | NM_024816 | 219057_at    | Rab Regulators/Effectors |
| RabGEF1/Rabex-5               | NM_014504 | 218310_at    | Rab Regulators/Effectors |
| RabGAP1/GAPCenA/TBC1D11       | NM_012197 | NM_014083_at | Rab Regulators/Effectors |
| RabGGTA                       | NM_004581 | 203573_s_at  | Rab Regulators/Effectors |
| RabGGTB                       | NM_004582 | 209180_at    | Rab Regulators/Effectors |
| Rabip4/RUFY1                  | NM_025158 | 218243_at    | Rab Regulators/Effectors |
| Rabip4R/RUFY2                 | NM_017987 | 219957_at    | Rab Regulators/Effectors |
| Rab1F/MSS4                    | NM_002871 | 204477_at    | Rab Regulators/Effectors |
| Rabphilin-3A                  | NM_014954 | 205230_at    | Rab Regulators/Effectors |
| Rabphilin-3A like/Noc2        | NM_006987 | 221614_s_at  | Rab Regulators/Effectors |
| Rabring7/ZNF364               | NM_014455 | 212742_at    | Rab Regulators/Effectors |
| RAD51                         | NM_002875 | 205023_at    | Rab Regulators/Effectors |
| RASA1                         | NM_022650 | 202677_at    | Rab Regulators/Effectors |
| RBP2                          | NM_015347 | 214811_at    | Rab Regulators/Effectors |
| RILP/SCARF1                   | NM_031430 | NM_031430_at | Rab Regulators/Effectors |
| RIM1                          | NM_014989 | 216184_s_at  | Rab Regulators/Effectors |
| RIM2                          | NM_014677 | 206137_at    | Rab Regulators/Effectors |
| RIM3/NIM3                     | NM_014747 | 204730_at    | Rab Regulators/Effectors |
| Rim1                          | NM_004292 | 205211_s_at  | Rab Regulators/Effectors |
| Rim2                          | NM_018993 | 209684_at    | Rab Regulators/Effectors |
| Rim3                          | NM_024832 | 219456_s_at  | Rab Regulators/Effectors |
| RN-TRE/USP6NL                 | XM_374768 | 204761_at    | Rab Regulators/Effectors |
| RUTBC1                        | NM_014853 | 212319_at    | Rab Regulators/Effectors |
| RUTBC3                        | NM_015705 | 203014_x_at  | Rab Regulators/Effectors |
| SEC15 like 2                  | XM_039570 | 215417_at    | Rab Regulators/Effectors |
| SHH                           | NM_000193 | 207586_at    | Rab Regulators/Effectors |
| SYN1                          | NM_006950 | 221914_at    | Rab Regulators/Effectors |
| Syntenin/SDCBP                | NM_005625 | 200958_s_at  | Rab Regulators/Effectors |
| TBC1D1                        | NM_015173 | 212350_at    | Rab Regulators/Effectors |
| TBC1D2                        | AF318370  | 222173_s_at  | Rab Regulators/Effectors |
| TBC1D4                        | NM_014832 | 203386_at    | Rab Regulators/Effectors |
| TBC1D5                        | NM_014744 | 201813_s_at  | Rab Regulators/Effectors |
| TBC1D10                       | NM_031937 | NM_031937_at | Rab Regulators/Effectors |
| TBC1D8                        | NM_007063 | 204526_s_at  | Rab Regulators/Effectors |
| TBC1D13                       | NM_018201 | 218596_at    | Rab Regulators/Effectors |
| TBC1D15                       | NM_022771 | 218268_at    | Rab Regulators/Effectors |
| TBC1D16                       | NM_019020 | 222116_s_at  | Rab Regulators/Effectors |
| TBC1D17                       | NM_024682 | 218466_at    | Rab Regulators/Effectors |
| TGN38/41                      | NM_006464 | 203833_s_at  | Rab Regulators/Effectors |
| TIP47                         | NM_005817 | 202122_s_at  | Rab Regulators/Effectors |
| TMF1                          | NM_007114 | 213024_at    | Rab Regulators/Effectors |
| TRAPPC4                       | NM_016146 | 217958_at    | Rab Regulators/Effectors |
| TSC2                          | NM_000548 | 215624_at    | Rab Regulators/Effectors |
| USP6/TRE17                    | NM_004505 | 206405_x_at  | Rab Regulators/Effectors |
| VPS9                          | NM_015635 | 214869_x_at  | Rab Regulators/Effectors |
| YIF1A                         | NM_020470 | 202418_at    | Rab Regulators/Effectors |
| YIP1/SMAP-5                   | NM_030799 | 221423_s_at  | Rab Regulators/Effectors |
| YIP2A/REEP1                   | NM_022912 | 204364_s_at  | Rab Regulators/Effectors |
| YIP2C/REEP4                   | NM_025232 | 218777_at    | Rab Regulators/Effectors |
| YIP2D/REEP2                   | NM_016606 | 205331_s_at  | Rab Regulators/Effectors |
| YIP2E/REEP5                   | NM_005669 | 208872_s_at  | Rab Regulators/Effectors |
| YIP3/PRA1/RABAC1              | NM_006423 | 203136_at    | Rab Regulators/Effectors |

## Human membrane genes and the corresponding GNF probesets

|                           |              |               |                            |
|---------------------------|--------------|---------------|----------------------------|
| YIP4                      | NM_173834    | 212340_at     | Rab Regulators/Effectors   |
| YIP5A                     | NM_018982    | 214733_s_at   | Rab Regulators/Effectors   |
| YIP5B/klip1               | NM_015388    | 216338_s_at   | Rab Regulators/Effectors   |
| YIP5C                     | NM_024029    | 219075_at     | Rab Regulators/Effectors   |
| YIP6A/PRA2/PRAF2          | NM_007213    | 203456_at     | Rab Regulators/Effectors   |
| YIP6B/PRA3/ARL6IP5        | NM_006407    | 200760_s_at   | Rab Regulators/Effectors   |
| XAPC7/PSMA7               | NM_002792    | 201114_x_at   | Rab Regulators/Effectors   |
| PIK3C2B                   | NM_002646    | 204484_at     | Kinases & Phosphatases     |
| PIK3C2G                   | NM_004570    | 215129_at     | Kinases & Phosphatases     |
| PIK3C2A                   | NM_002645    | 213070_at     | Kinases & Phosphatases     |
| PIK3C3/VPS34              | NM_002647    | 204297_at     | Kinases & Phosphatases     |
| PIK3CA                    | NM_006218    | 204369_at     | Kinases & Phosphatases     |
| PIK3CB                    | NM_006219    | 212688_at     | Kinases & Phosphatases     |
| PIK3CD                    | NM_005026    | 203879_at     | Kinases & Phosphatases     |
| PIK3CG                    | NM_002649    | 206369_s_at   | Kinases & Phosphatases     |
| PIK3R4/p150               | NM_014602    | 212740_at     | Kinases & Phosphatases     |
| PIK3R1/p85 alpha          | NM_181504    | 212239_at     | Kinases & Phosphatases     |
| PIK4CA                    | NM_058004    | 207081_s_at   | Kinases & Phosphatases     |
| PIK4CB                    | NM_002651    | 206138_s_at   | Kinases & Phosphatases     |
| PIP5K3/PIKfyve            | NM_001002881 | 213111_at     | Kinases & Phosphatases     |
| PIP5K1A/PIP5KI alpha      | NM_003557    | 207391_s_at   | Kinases & Phosphatases     |
| PIP5K1B/PIP5KI beta       | NM_003558    | 205632_s_at   | Kinases & Phosphatases     |
| PIP5K1C/PIP5K gamma       | NM_012398    | 212518_at     | Kinases & Phosphatases     |
| PLC delta 1               | NM_006225    | 205125_at     | Kinases & Phosphatases     |
| PKC lambda/iota           | NM_002740    | 209677_at     | Kinases & Phosphatases     |
| PKC zeta                  | NM_002744    | 202178_at     | Kinases & Phosphatases     |
| PKC beta 1                | NM_002738    | 207957_s_at   | Kinases & Phosphatases     |
| PKC alpha                 | NM_002737    | 206923_at     | Kinases & Phosphatases     |
| PTEN                      | NM_000314    | 204054_at     | Kinases & Phosphatases     |
| PDE6D/PDED                | NM_002601    | 204091_at     | Kinases & Phosphatases     |
| PKA catalytic alpha       | NM_002730    | 202801_at     | Kinases & Phosphatases     |
| PRKAR2A                   | NM_004157    | 204842_x_at   | Kinases & Phosphatases     |
| CDC2/CDK1                 | NM_001786    | 203213_at     | Kinases & Phosphatases     |
| PLK1                      | NM_005030    | 202240_at     | Kinases & Phosphatases     |
| PYK2/PTK2B                | NM_004103    | 203110_at     | Kinases & Phosphatases     |
| ALK                       | NM_004304    | 208211_s_at   | Kinases & Phosphatases     |
| Bet1                      | NM_005868    | 202710_at     | Snares                     |
| Bet1 like                 | NM_016526    | NM_016465_at  | Snares                     |
| GOSR1/GOS28               | NM_004871    | 204630_s_at   | Snares                     |
| GOSR2                     | NM_054022    | 210009_s_at   | Snares                     |
| NAPa                      | NM_003827    | 206491_s_at   | Snares                     |
| NAPg                      | NM_003826    | 210048_at     | Snares                     |
| SNAP-23                   | NM_003825    | 209130_at     | Snares                     |
| SNAP-25                   | NM_003081    | 202508_s_at   | Snares                     |
| SNAP-29                   | NM_004782    | 218327_s_at   | Snares                     |
| SEC22 like 1              | NM_004892    | 201103_x_at   | Snares                     |
| SEC22 like 2              | NM_012430    | 218703_at     | Snares                     |
| Syntaxin 1A               | NM_004603    | 204729_s_at   | Snares                     |
| Syntaxin 1B1              | NM_003163    | 208207_at     | Snares                     |
| Syntaxin 1B2              | NM_052874    | NM_052874_at  | Snares                     |
| Syntaxin 2                | NM_001980    | 207346_at     | Snares                     |
| Syntaxin 3A               | NM_004177    | 209238_at     | Snares                     |
| Syntaxin 4A               | NM_004604    | 203530_s_at   | Snares                     |
| Syntaxin 5A               | NM_003164    | 203330_s_at   | Snares                     |
| Syntaxin 6                | NM_005819    | 214441_at     | Snares                     |
| Syntaxin 7                | NM_003569    | 203457_at     | Snares                     |
| Syntaxin 8                | NM_004853    | 204690_at     | Snares                     |
| Syntaxin 10               | NM_003765    | 212625_at     | Snares                     |
| Syntaxin 11               | NM_003764    | 210190_at     | Snares                     |
| Syntaxin 12               | NM_177424    | 212111_at     | Snares                     |
| Syntaxin 16               | NM_003763    | 221500_s_at   | Snares                     |
| Syntaxin 17               | NM_017919    | 218666_s_at   | Snares                     |
| Syntaxin 18               | NM_016930    | 218763_at     | Snares                     |
| VAMP1/Synaptobrevin       | NM_014231    | 207101_at     | Snares                     |
| VAMP2                     | NM_014232    | 201557_at     | Snares                     |
| VAMP3                     | NM_004781    | 201337_s_at   | Snares                     |
| VAMP4                     | NM_003762    | 207350_s_at   | Snares                     |
| VAMP5                     | NM_006634    | 204929_s_at   | Snares                     |
| VAMP8                     | NM_003761    | 202546_at     | Snares                     |
| Vti1                      | NM_006370    | 209452_s_at   | Snares                     |
| Vti1A                     | NM_145206    | en266681_x_at | Snares                     |
| Ykt6                      | NM_006555    | 217784_at     | Snares                     |
| Amisyn                    | NM_014178    | 220994_s_at   | Snare Regulators/Effectors |
| App4A                     | NM_052936    | 213115_at     | Snare Regulators/Effectors |
| App4B                     | NM_013325    | 204903_x_at   | Snare Regulators/Effectors |
| CPLX1                     | NM_006651    | NM_006651_at  | Snare Regulators/Effectors |
| CPLX2                     | NM_006650    | 206368_at     | Snare Regulators/Effectors |
| GATE-16/GABARAPL2         | NM_007285    | 209046_s_at   | Snare Regulators/Effectors |
| LAMA1                     | NM_005559    | en217721_s_at | Snare Regulators/Effectors |
| LAMA2                     | NM_000426    | 205116_at     | Snare Regulators/Effectors |
| LAMA3                     | NM_000227    | 203726_s_at   | Snare Regulators/Effectors |
| LAMA4                     | NM_002290    | 202202_s_at   | Snare Regulators/Effectors |
| LAMA5                     | NM_005560    | 210150_s_at   | Snare Regulators/Effectors |
| Munc13/UNC13B             | NM_006377    | 202893_at     | Snare Regulators/Effectors |
| NSF                       | NM_006178    | 202395_at     | Snare Regulators/Effectors |
| Shy1                      | NM_016106    | 215548_s_at   | Snare Regulators/Effectors |
| STXBP1/Munc18-1           | NM_003165    | 202260_s_at   | Snare Regulators/Effectors |
| STXBP2/Munc18-2           | NM_006949    | 209367_at     | Snare Regulators/Effectors |
| STXBP3/Munc18-3           | NM_007269    | 203310_at     | Snare Regulators/Effectors |
| STXBPS/LLGL3              | NM_139244    | en179882_s_at | Snare Regulators/Effectors |
| STXBPS like/LLGL4         | XM_045911    | en273572_s_at | Snare Regulators/Effectors |
| Synaptophysin             | NM_003179    | 213200_at     | Snare Regulators/Effectors |
| Synaptotagmin I           | NM_005639    | 203999_at     | Snare Regulators/Effectors |
| Synaptotagmin I like/Slp1 | NM_032872    | NM_032872_at  | Snare Regulators/Effectors |
| Synaptotagmin II          | NM_177402    | en272211_s_at | Snare Regulators/Effectors |

## Human membrane genes and the corresponding GNF probesets

|                            |              |               |                                       |
|----------------------------|--------------|---------------|---------------------------------------|
| Synaptotagmin II like/Slp2 | NM_032943    | NM_032379_at  | Snare Regulators/Effectors            |
| Synaptotagmin III          | NM_032298    | NM_032298_at  | Snare Regulators/Effectors            |
| Synaptotagmin V            | NM_003180    | 206162_x_at   | Snare Regulators/Effectors            |
| Synaptotagmin V like/Slp5  | NM_138780    | en275968_at   | Snare Regulators/Effectors            |
| Synaptotagmin VIII         | NM_138567    | en271613_s_at | Snare Regulators/Effectors            |
| Synaptotagmin X            | NM_198992    | en228567_at   | Snare Regulators/Effectors            |
| Synaptotagmin XI           | NM_152280    | 209198_s_at   | Snare Regulators/Effectors            |
| Synaptotagmin XIII         | NM_020826    | 221859_at     | Snare Regulators/Effectors            |
| Synaptotagmin XIV          | NM_153262    | en271745_at   | Snare Regulators/Effectors            |
| Syntaxilin                 | NM_014723    | 205104_at     | Snare Regulators/Effectors            |
| Syntaxilin/KIAA1472        | NM_017786    | 218692_at     | Snare Regulators/Effectors            |
| VPS33A                     | NM_022916    | 204590_x_at   | Snare Regulators/Effectors            |
| VPS33B                     | NM_018668    | 218415_at     | Snare Regulators/Effectors            |
| VPS39/hVAMP6p              | NM_015289    | 212156_at     | Snare Regulators/Effectors            |
| VPS45                      | NM_007259    | 209268_at     | Snare Regulators/Effectors            |
| AMPH                       | NM_001635    | 205257_s_at   | Coats & Adaptors/Regulators/Effectors |
| ANT1/SLC25A4               | NM_001151    | 202825_at     | Coats & Adaptors/Regulators/Effectors |
| ADRP/ADFP                  | NM_001122    | 209122_at     | Coats & Adaptors/Regulators/Effectors |
| ADCYAPIR1                  | NM_001118    | 207151_at     | Coats & Adaptors/Regulators/Effectors |
| API beta 1                 | NM_001127    | 205423_at     | Coats & Adaptors/Regulators/Effectors |
| API gamma 1                | NM_001128    | 203350_at     | Coats & Adaptors/Regulators/Effectors |
| API gamma 2                | NM_003917    | 201613_s_at   | Coats & Adaptors/Regulators/Effectors |
| API gamma BP1              | NM_080551    | 221937_at     | Coats & Adaptors/Regulators/Effectors |
| API mu 2                   | NM_005498    | 218261_at     | Coats & Adaptors/Regulators/Effectors |
| API sigma 1                | NM_001283    | 205195_at     | Coats & Adaptors/Regulators/Effectors |
| API sigma 2                | NM_003916    | 203299_s_at   | Coats & Adaptors/Regulators/Effectors |
| AP2 alpha 2                | NM_012305    | 211779_x_at   | Coats & Adaptors/Regulators/Effectors |
| AP2 beta 1                 | NM_001282    | 200612_s_at   | Coats & Adaptors/Regulators/Effectors |
| AP2 mu 1                   | NM_004068    | 200613_at     | Coats & Adaptors/Regulators/Effectors |
| AP2 sigma 1                | NM_021575    | 202120_x_at   | Coats & Adaptors/Regulators/Effectors |
| AP3 beta 1                 | NM_003664    | 203142_s_at   | Coats & Adaptors/Regulators/Effectors |
| AP3 beta 2                 | NM_004644    | 205678_at     | Coats & Adaptors/Regulators/Effectors |
| AP3 delta 1                | NM_003938    | 206592_s_at   | Coats & Adaptors/Regulators/Effectors |
| AP3 mu 2                   | NM_006803    | 203410_at     | Coats & Adaptors/Regulators/Effectors |
| AP3 sigma 1                | NM_001284    | 202442_at     | Coats & Adaptors/Regulators/Effectors |
| AP3 sigma 2                | NM_005829    | 202398_at     | Coats & Adaptors/Regulators/Effectors |
| AP4 epsilon 1              | NM_007347    | 220228_at     | Coats & Adaptors/Regulators/Effectors |
| AP4 mu 1                   | NM_004722    | 209837_at     | Coats & Adaptors/Regulators/Effectors |
| AP4 sigma 1                | NM_007077    | 210952_at     | Coats & Adaptors/Regulators/Effectors |
| ARF1                       | NM_001658    | 208750_s_at   | Coats & Adaptors/Regulators/Effectors |
| ARF3                       | NM_001659    | 200011_s_at   | Coats & Adaptors/Regulators/Effectors |
| ARF4                       | NM_001660    | 201097_s_at   | Coats & Adaptors/Regulators/Effectors |
| ARF5                       | NM_001662    | 201526_at     | Coats & Adaptors/Regulators/Effectors |
| ARF6                       | NM_001663    | 203311_s_at   | Coats & Adaptors/Regulators/Effectors |
| ARF-GEP(100)/KIA0763       | NM_014869    | 203906_at     | Coats & Adaptors/Regulators/Effectors |
| ARFIP1/Arfapin             | NM_014447    | 214483_s_at   | Coats & Adaptors/Regulators/Effectors |
| ARFIP2/POR1                | NM_012402    | 202109_at     | Coats & Adaptors/Regulators/Effectors |
| ARFRP1                     | NM_003224    | 215984_s_at   | Coats & Adaptors/Regulators/Effectors |
| ARFRP2                     | NM_019087    | 219842_at     | Coats & Adaptors/Regulators/Effectors |
| ARAP3                      | NM_022481    | 218950_at     | Coats & Adaptors/Regulators/Effectors |
| ARFGAP1                    | NM_018209    | 217888_s_at   | Coats & Adaptors/Regulators/Effectors |
| ARFGAP3                    | NM_014570    | 202211_at     | Coats & Adaptors/Regulators/Effectors |
| GIT1/p95-APP1              | NM_014030    | 218030_at     | Coats & Adaptors/Regulators/Effectors |
| ARL1                       | NM_001177    | 201659_s_at   | Coats & Adaptors/Regulators/Effectors |
| ARL2                       | NM_001667    | 202564_x_at   | Coats & Adaptors/Regulators/Effectors |
| ARL3                       | NM_004311    | 202641_at     | Coats & Adaptors/Regulators/Effectors |
| ARL4                       | NM_005738    | 205020_s_at   | Coats & Adaptors/Regulators/Effectors |
| ARL5                       | NM_012097    | 218150_at     | Coats & Adaptors/Regulators/Effectors |
| ARF4L/ARL6                 | NM_032146    | NM_032146_at  | Coats & Adaptors/Regulators/Effectors |
| ARL7                       | NM_005737    | 202208_s_at   | Coats & Adaptors/Regulators/Effectors |
| ARL10A                     | NM_173664    | 209328_x_at   | Coats & Adaptors/Regulators/Effectors |
| ARL10C                     | NM_018184    | 217852_s_at   | Coats & Adaptors/Regulators/Effectors |
| ARL6IP                     | NM_015161    | 211935_at     | Coats & Adaptors/Regulators/Effectors |
| ARL6IP2                    | NM_022374    | NM_022374_at  | Coats & Adaptors/Regulators/Effectors |
| ARL6IP4                    | NM_001002251 | 218216_x_at   | Coats & Adaptors/Regulators/Effectors |
| ARL2BP/BART1               | NM_012106    | 202091_at     | Coats & Adaptors/Regulators/Effectors |
| ARR3                       | NM_004312    | 207136_at     | Coats & Adaptors/Regulators/Effectors |
| ARRB1/Arrestin beta 1      | NM_004041    | 218832_x_at   | Coats & Adaptors/Regulators/Effectors |
| ARRB2/Arrestin beta 2      | NM_004313    | 203388_at     | Coats & Adaptors/Regulators/Effectors |
| BIG1/ArfGEF1               | NM_006421    | 202956_at     | Coats & Adaptors/Regulators/Effectors |
| BIG2/ArfGEF2               | NM_006420    | 218098_at     | Coats & Adaptors/Regulators/Effectors |
| CARF                       | NM_017632    | 218929_at     | Coats & Adaptors/Regulators/Effectors |
| CAV1                       | NM_001753    | 203065_s_at   | Coats & Adaptors/Regulators/Effectors |
| CAV2                       | NM_001233    | 203323_at     | Coats & Adaptors/Regulators/Effectors |
| CAV3                       | NM_001234    | 208204_s_at   | Coats & Adaptors/Regulators/Effectors |
| CBX5                       | NM_012117    | 209715_at     | Coats & Adaptors/Regulators/Effectors |
| Centaurin alpha 1          | NM_006869    | 219150_s_at   | Coats & Adaptors/Regulators/Effectors |
| Centaurin alpha 2          | NM_018404    | 219358_s_at   | Coats & Adaptors/Regulators/Effectors |
| Centaurin beta 1/ACAP1     | NM_014716    | 205212_s_at   | Coats & Adaptors/Regulators/Effectors |
| Centaurin beta 2/ACAP2     | NM_012287    | 212476_at     | Coats & Adaptors/Regulators/Effectors |
| Centaurin delta 1          | NM_139182    | 213618_at     | Coats & Adaptors/Regulators/Effectors |
| Centaurin delta 2/ARAP1    | NM_015242    | 212516_at     | Coats & Adaptors/Regulators/Effectors |
| Centaurin gamma 1          | NM_014770    | 206152_at     | Coats & Adaptors/Regulators/Effectors |
| Centaurin gamma 2/AGAP1    | NM_014914    | 204066_s_at   | Coats & Adaptors/Regulators/Effectors |
| Centaurin gamma 3          | NM_031946    | NM_031946_at  | Coats & Adaptors/Regulators/Effectors |
| CHRM3                      | NM_000740    | 214596_at     | Coats & Adaptors/Regulators/Effectors |
| CTGLF1/MRIP2               | NM_133446    | 221850_x_at   | Coats & Adaptors/Regulators/Effectors |
| CLH22                      | NM_001835    | 205944_s_at   | Coats & Adaptors/Regulators/Effectors |
| CLTA                       | NM_001833    | 204050_s_at   | Coats & Adaptors/Regulators/Effectors |
| CLTB                       | NM_001834    | 206284_x_at   | Coats & Adaptors/Regulators/Effectors |
| CLTC                       | NM_004859    | 200614_at     | Coats & Adaptors/Regulators/Effectors |
| COP epsilon                | NM_007263    | 201264_at     | Coats & Adaptors/Regulators/Effectors |
| COP alpha                  | NM_004371    | 208684_at     | Coats & Adaptors/Regulators/Effectors |
| COP beta                   | NM_016451    | 201358_s_at   | Coats & Adaptors/Regulators/Effectors |
| COP beta 2                 | NM_004766    | 201098_at     | Coats & Adaptors/Regulators/Effectors |

## Human membrane genes and the corresponding GNF probesets

|                             |           |              |                                       |
|-----------------------------|-----------|--------------|---------------------------------------|
| COP gamma                   | NM_016128 | 217749_at    | Coats & Adaptors/Regulators/Effectors |
| COP zeta 1                  | NM_016057 | 217726_at    | Coats & Adaptors/Regulators/Effectors |
| COP zeta 2                  | NM_016429 | 219561_at    | Coats & Adaptors/Regulators/Effectors |
| CPE                         | NM_001873 | 201116_s_at  | Coats & Adaptors/Regulators/Effectors |
| DDEF1/ASAP1                 | NM_018482 | 221039_s_at  | Coats & Adaptors/Regulators/Effectors |
| DDEF2/PAG3                  | NM_003887 | 206414_s_at  | Coats & Adaptors/Regulators/Effectors |
| Dynamin I                   | NM_004408 | 217341_at    | Coats & Adaptors/Regulators/Effectors |
| Dynamin I like              | NM_005690 | 203105_s_at  | Coats & Adaptors/Regulators/Effectors |
| Dynamin II                  | NM_004945 | 202253_s_at  | Coats & Adaptors/Regulators/Effectors |
| Dynamin III                 | NM_015569 | 209839_at    | Coats & Adaptors/Regulators/Effectors |
| DNMBP                       | NM_015221 | 212838_at    | Coats & Adaptors/Regulators/Effectors |
| EAP30                       | NM_007241 | 218391_at    | Coats & Adaptors/Regulators/Effectors |
| EGFR                        | NM_005228 | 201983_s_at  | Coats & Adaptors/Regulators/Effectors |
| Epsin 1                     | NM_013333 | 221141_x_at  | Coats & Adaptors/Regulators/Effectors |
| Epsin 2                     | NM_148921 | 203463_s_at  | Coats & Adaptors/Regulators/Effectors |
| Epsin 3                     | NM_017957 | 220318_at    | Coats & Adaptors/Regulators/Effectors |
| ExoC1                       | NM_018261 | 222127_s_at  | Coats & Adaptors/Regulators/Effectors |
| ExoC7                       | NM_015219 | 215413_at    | Coats & Adaptors/Regulators/Effectors |
| FAPP1/PLEKHA3               | NM_019091 | NM_019091_at | Coats & Adaptors/Regulators/Effectors |
| FAPP2                       | NM_032639 | 220157_x_at  | Coats & Adaptors/Regulators/Effectors |
| FBXO8                       | NM_012180 | NM_012180_at | Coats & Adaptors/Regulators/Effectors |
| GBF1                        | NM_004193 | 201439_at    | Coats & Adaptors/Regulators/Effectors |
| GGA1                        | NM_013365 | 218114_at    | Coats & Adaptors/Regulators/Effectors |
| GGA2                        | NM_015044 | 214189_s_at  | Coats & Adaptors/Regulators/Effectors |
| GGA3                        | NM_014001 | 209411_s_at  | Coats & Adaptors/Regulators/Effectors |
| GIT2                        | NM_014776 | 204982_at    | Coats & Adaptors/Regulators/Effectors |
| HTR2A/5-HT2A                | NM_000621 | 207135_at    | Coats & Adaptors/Regulators/Effectors |
| HRB like                    | NM_006076 | 206820_at    | Coats & Adaptors/Regulators/Effectors |
| HRG4/UNC119                 | NM_005148 | 203271_s_at  | Coats & Adaptors/Regulators/Effectors |
| HRS/HGS                     | NM_004712 | 210428_s_at  | Coats & Adaptors/Regulators/Effectors |
| DNJC6/Auxilin/HSP40 homolog | NM_014787 | 204720_s_at  | Coats & Adaptors/Regulators/Effectors |
| HSPA8/HSC70                 | NP_006588 | 208687_x_at  | Coats & Adaptors/Regulators/Effectors |
| KIF23/MKL1P1                | NM_004856 | 204709_s_at  | Coats & Adaptors/Regulators/Effectors |
| IPCEF1/PIP3-E               | NM_015553 | 214735_at    | Coats & Adaptors/Regulators/Effectors |
| LHCGR                       | NM_000233 | 207240_s_at  | Coats & Adaptors/Regulators/Effectors |
| MINT1/APBA1                 | NM_001163 | 206679_at    | Coats & Adaptors/Regulators/Effectors |
| MINT2/APBA2                 | NM_005503 | 209870_s_at  | Coats & Adaptors/Regulators/Effectors |
| MINT3/APBA3                 | NM_004886 | 205146_x_at  | Coats & Adaptors/Regulators/Effectors |
| NME1/NM23-II1               | NM_000269 | 201577_at    | Coats & Adaptors/Regulators/Effectors |
| p24A/RNP24                  | NM_006815 | 200087_s_at  | Coats & Adaptors/Regulators/Effectors |
| PLD1                        | NM_002662 | 177_at       | Coats & Adaptors/Regulators/Effectors |
| PLD2                        | NM_002663 | 209643_s_at  | Coats & Adaptors/Regulators/Effectors |
| PRKCABP/PICK1               | NM_012407 | 204746_s_at  | Coats & Adaptors/Regulators/Effectors |
| PSCD1/Sec7/Cytohesin-1      | NM_004762 | 202879_s_at  | Coats & Adaptors/Regulators/Effectors |
| PSCD2/Sec7p like/ARNO       | NM_004228 | 209158_s_at  | Coats & Adaptors/Regulators/Effectors |
| PSCD3/GRP1                  | NM_004227 | 206523_at    | Coats & Adaptors/Regulators/Effectors |
| PSCD4/CYT4                  | NM_013385 | 211521_s_at  | Coats & Adaptors/Regulators/Effectors |
| PSD/TYL/EFA6A               | NM_002779 | 208102_s_at  | Coats & Adaptors/Regulators/Effectors |
| PSD3/EFA6R                  | NM_015310 | 203354_s_at  | Coats & Adaptors/Regulators/Effectors |
| PSD4/EFA6B/TIC              | NM_012455 | 203317_at    | Coats & Adaptors/Regulators/Effectors |
| RANBP2                      | NM_006267 | 201711_x_at  | Coats & Adaptors/Regulators/Effectors |
| RGS2                        | NM_002923 | 202388_at    | Coats & Adaptors/Regulators/Effectors |
| RGS4                        | NM_005613 | 204337_at    | Coats & Adaptors/Regulators/Effectors |
| RIP/Hrb                     | NM_004504 | 213926_s_at  | Coats & Adaptors/Regulators/Effectors |
| RP2                         | NM_006915 | 205191_at    | Coats & Adaptors/Regulators/Effectors |
| SAR1A                       | NM_020150 | 201542_at    | Coats & Adaptors/Regulators/Effectors |
| SAR1B                       | NM_016103 | 218254_s_at  | Coats & Adaptors/Regulators/Effectors |
| SEC10L/ExoC5                | NM_006544 | 218748_s_at  | Coats & Adaptors/Regulators/Effectors |
| SEC12/PREB                  | NM_013388 | 217861_s_at  | Coats & Adaptors/Regulators/Effectors |
| SEC13 like 1/SEC13R         | NM_030673 | 207707_s_at  | Coats & Adaptors/Regulators/Effectors |
| SEC13 like/SEH1             | NM_031216 | 221931_s_at  | Coats & Adaptors/Regulators/Effectors |
| SEC23A                      | NM_006364 | 204344_s_at  | Coats & Adaptors/Regulators/Effectors |
| SEC23B                      | NM_006363 | 201582_at    | Coats & Adaptors/Regulators/Effectors |
| SEC24A                      | XM_094581 | 212900_at    | Coats & Adaptors/Regulators/Effectors |
| SEC24B                      | NM_006323 | 202798_at    | Coats & Adaptors/Regulators/Effectors |
| SEC24C                      | NM_004922 | 202361_at    | Coats & Adaptors/Regulators/Effectors |
| SEC24D                      | NM_014822 | 202375_at    | Coats & Adaptors/Regulators/Effectors |
| SEC31A/SEC31 like 1         | NM_014933 | 200945_s_at  | Coats & Adaptors/Regulators/Effectors |
| SEC31B/SEC31 like 2         | NM_015490 | 209889_at    | Coats & Adaptors/Regulators/Effectors |
| SEC23IP/P125                | NM_007190 | 209175_at    | Coats & Adaptors/Regulators/Effectors |
| SEC5                        | NM_018303 | 219349_s_at  | Coats & Adaptors/Regulators/Effectors |
| SEC61B                      | NM_006808 | 203133_at    | Coats & Adaptors/Regulators/Effectors |
| SMAP1                       | NM_021940 | 218137_s_at  | Coats & Adaptors/Regulators/Effectors |
| SRPRB                       | NM_021203 | 218140_x_at  | Coats & Adaptors/Regulators/Effectors |
| STAM1                       | NM_003473 | 203544_s_at  | Coats & Adaptors/Regulators/Effectors |
| STAM2                       | NM_005843 | 209649_at    | Coats & Adaptors/Regulators/Effectors |
| Stonin 1                    | NM_006873 | 220190_s_at  | Coats & Adaptors/Regulators/Effectors |
| TBCD                        | NM_005993 | 201759_at    | Coats & Adaptors/Regulators/Effectors |
| TRIM23/ARFD1                | NM_001656 | 204732_s_at  | Coats & Adaptors/Regulators/Effectors |
| p23/TMP21                   | NM_006827 | 200929_at    | Coats & Adaptors/Regulators/Effectors |
| TSG101                      | NM_006292 | 201758_at    | Coats & Adaptors/Regulators/Effectors |
| VPS11                       | NM_021729 | 203292_s_at  | Coats & Adaptors/Regulators/Effectors |
| VPS16                       | NM_022575 | 203459_s_at  | Coats & Adaptors/Regulators/Effectors |
| VPS26                       | NM_004896 | 201807_at    | Coats & Adaptors/Regulators/Effectors |
| VPS28                       | NM_016208 | 218679_s_at  | Coats & Adaptors/Regulators/Effectors |
| Vps35                       | NM_018206 | 217727_x_at  | Coats & Adaptors/Regulators/Effectors |
| VPS4A                       | NM_013245 | 217913_at    | Coats & Adaptors/Regulators/Effectors |
| VPS4B                       | NM_004869 | 218171_at    | Coats & Adaptors/Regulators/Effectors |
| ZFP410/APA1                 | NM_021188 | 202010_s_at  | Coats & Adaptors/Regulators/Effectors |
| ZNF219                      | NM_016423 | 219314_s_at  | Coats & Adaptors/Regulators/Effectors |

## Mouse membrane genes and the corresponding GNF probesets

| Gene/Protein           | Accession number | Probe Set                 | Class                    |
|------------------------|------------------|---------------------------|--------------------------|
| Rab1A                  | NM_008996        | gnf1m00094_a_at           | Rabs                     |
| Rab1B                  | NM_029576        | gnf1m05480_a_at           | Rabs                     |
| Rab1C/Rab35            | NM_198163        | gnf1m29637_a_at           | Rabs                     |
| Rab2                   | NM_021518        | gnf1m09481_s_at           | Rabs                     |
| Rab2B                  | NM_172601        | gnf1m12150_a_at           | Rabs                     |
| Rab3A                  | NM_009001        | gnf1m11065_a_at           | Rabs                     |
| Rab3B                  | NM_023537        | gnf1m12696_at             | Rabs                     |
| Rab3C                  | NM_023852        | gnf1m12185_a_at           | Rabs                     |
| Rab3D                  | NM_031874        | gnf1m05694_a_at           | Rabs                     |
| Rab4A                  | NM_009003        | gnf1m01658_a_at           | Rabs                     |
| Rab4B                  | NM_029391        | gnf1m05449_a_at           | Rabs                     |
| Rab5A                  | NM_025887        | gnf1m12599_s_at           | Rabs                     |
| Rab5B                  | NM_011229        | gnf1m12529_at             | Rabs                     |
| Rab5C                  | NM_024456        | gnf1m13184_a_at           | Rabs                     |
| Rab6                   | NM_024287        | gnf1m12755_at             | Rabs                     |
| Rab7                   | NM_009005        | gnf1m01659_a_at           | Rabs                     |
| Rab8A                  | NM_023126        | gnf1m25010_at             | Rabs                     |
| Rab8B                  | NM_173413        | gnf1m08734_s_at           | Rabs                     |
| Rab9                   | NM_019773        | gnf1m03805_s_at           | Rabs                     |
| Rab10                  | NM_016676        | gnf1m11317_a_at           | Rabs                     |
| Rab11A                 | NM_017382        | gnf1m24119_at             | Rabs                     |
| Rab11B                 | NM_008997        | gnf1m01657_a_at           | Rabs                     |
| Rab12                  | NM_024448        | gnf1m21996_at             | Rabs                     |
| Rab13                  | NM_026677        | gnf1m26313_a_at           | Rabs                     |
| Rab14                  | NM_026697        | gnf1m26043_at             | Rabs                     |
| Rab15                  | NM_134050        | gnf1m10409_a_at           | Rabs                     |
| Rab17                  | NM_008998        | gnf1m10946_a_at           | Rabs                     |
| Rab18                  | NM_011225        | gnf1m24762_at             | Rabs                     |
| Rab19                  | NM_011226        | gnf1m29151_a_at           | Rabs                     |
| Rab20                  | NM_011227        | gnf1m21572_at             | Rabs                     |
| Rab21                  | NM_024454        | gnf1m17574_s_at           | Rabs                     |
| Rab22A                 | NM_024436        | gnf1m04433_s_at           | Rabs                     |
| Rab23                  | NM_008999        | gnf1m12508_a_at           | Rabs                     |
| Rab24                  | NM_009000        | gnf1m11817_s_at           | Rabs                     |
| Rab25                  | NM_016899        | gnf1m10975_a_at           | Rabs                     |
| Rab26                  | XM_283428        | gnf1m26063_a_at           | Rabs                     |
| Rab27A                 | NM_023635        | gnf1m11592_a_at           | Rabs                     |
| Rab28                  | NM_027295        | gnf1m16665_a_at           | Rabs                     |
| Rab30                  | NM_029494        | gnf1m07491_at             | Rabs                     |
| Rab31                  | NM_133685        | gnf1m06032_a_at           | Rabs                     |
| Rab32                  | NM_026405        | gnf1m13152_a_at           | Rabs                     |
| Rab33A                 | NM_011228        | gnf1m02702_at             | Rabs                     |
| Rab33B                 | NM_016858        | gnf1m03493_a_at           | Rabs                     |
| Rab34                  | NM_033475        | gnf1m10911_s_at           | Rabs                     |
| Rab36                  | NM_029781        | gnf1m25402_at             | Rabs                     |
| Rab37                  | NM_021411        | gnf1m12467_a_at           | Rabs                     |
| Rab38                  | NM_028238        | gnf1m13085_a_at           | Rabs                     |
| Rab39                  | NM_175562        | gnf1m08418_a_at           | Rabs                     |
| Rab39B                 | NM_175122        | gnf1m08919_a_at           | Rabs                     |
| Rab40C                 | NM_139154        | gnf1m06310_a_at           | Rabs                     |
| AGTR1                  | NM_177322        | gnf1m00547_a_at           | Rab Regulators/Effectors |
| ALS2                   | NM_028717        | gnf1m05342_a_at           | Rab Regulators/Effectors |
| ALS2CL                 | NM_146228        | gnf1m24053_at             | Rab Regulators/Effectors |
| ANKRD27                | NM_145633        | gnf1m06603_a_at           | Rab Regulators/Effectors |
| APPL1/DIPI3 beta       | NM_145220        | gnf1m06460_a_at           | Rab Regulators/Effectors |
| APPL2/APLP2            | NM_009691        | gnf1m02022_a_at           | Rab Regulators/Effectors |
| BICD1                  | NM_009753        | gnf1m29839_s_at           | Rab Regulators/Effectors |
| BICD2                  | NM_029791        | gnf1m05508_a_at           | Rab Regulators/Effectors |
| Calmodulin             | NM_009790        | gnf1m11020_a_at           | Rab Regulators/Effectors |
| CASP/CUTL1             | NM_009986        | gnf1m02159_a_at           | Rab Regulators/Effectors |
| CD2AP/CMS              | NM_009847        | gnf1m15748_a_at           | Rab Regulators/Effectors |
| Chm/REP1               | NM_018818        | gnf1m03635_a_at           | Rab Regulators/Effectors |
| Chml/REP2              | NM_021350        | gnf1m04044_a_at           | Rab Regulators/Effectors |
| COG1                   | NM_013581        | gnf1m03162_a_at           | Rab Regulators/Effectors |
| COG2                   | NM_029746        | gnf1m05503_a_at           | Rab Regulators/Effectors |
| COG3                   | NM_177381        | gnf1m00734_a_at           | Rab Regulators/Effectors |
| COG4                   | NM_133973        | gnf1m06113_a_at           | Rab Regulators/Effectors |
| COG6                   | NM_026225        | gnf1m00618_a_at           | Rab Regulators/Effectors |
| COG8                   | NM_139229        | gnf1m29854_a_at           | Rab Regulators/Effectors |
| DCTN1                  | NM_007835        | gnf1m01015_a_at           | Rab Regulators/Effectors |
| DNCL1/DNCL1            | NM_019682        | gnf1m09528_s_at           | Rab Regulators/Effectors |
| EHD1                   | NM_010119        | gnf1m16307_a_at           | Rab Regulators/Effectors |
| EPAC2/cAMP-GEFII       | NM_019688        | gnf1m08010_a_at           | Rab Regulators/Effectors |
| EPS8                   | NM_007945        | gnf1m01082_a_at           | Rab Regulators/Effectors |
| ERC2/CAST              | NM_177814        | gnf1m08476_a_at           | Rab Regulators/Effectors |
| EVI5                   | NM_007964        | gnf1m01093_a_at           | Rab Regulators/Effectors |
| GAPDH                  | NM_001001303     | AFFX-GapdhMur/M32599_3_at | Rab Regulators/Effectors |
| GDI1                   | NM_010273        | gnf1m23605_a_at           | Rab Regulators/Effectors |
| GDI2                   | NM_008111        | gnf1m01179_at             | Rab Regulators/Effectors |
| GDI3                   | NM_008112        | gnf1m11766_at             | Rab Regulators/Effectors |
| GCP60                  | NM_133225        | gnf1m29341_a_at           | Rab Regulators/Effectors |
| Giantin/GOLGB1         | XM_148244        | gnf1m18906_at             | Rab Regulators/Effectors |
| Golga2/GM130/Golgin-95 | NM_133852        | gnf1m06084_a_at           | Rab Regulators/Effectors |
| GOLGA1/Golgin-97       | NM_029793        | gnf1m30535_at             | Rab Regulators/Effectors |
| GOLGA3                 | NM_008146        | gnf1m01192_s_at           | Rab Regulators/Effectors |
| GOLGA4/Golgin-245      | NM_018748        | gnf1m03593_a_at           | Rab Regulators/Effectors |
| GOLGIN-84              | NM_013747        | gnf1m10906_a_at           | Rab Regulators/Effectors |
| GOLGA7                 | NM_020585        | gnf1m17613_at             | Rab Regulators/Effectors |
| Golgin-45/BLZF1        | NM_025505        | gnf1m11489_at             | Rab Regulators/Effectors |
| GRASP-55               | NM_027352        | gnf1m00359_a_at           | Rab Regulators/Effectors |
| GRASP-65               | NM_028976        | gnf1m29541_a_at           | Rab Regulators/Effectors |
| GRTPI1/TBCID6          | NM_025768        | gnf1m12664_a_at           | Rab Regulators/Effectors |
| HERC1                  | XM_358383        | gnf1m12507_a_at           | Rab Regulators/Effectors |
| HOOK1                  | NM_030014        | gnf1m29759_a_at           | Rab Regulators/Effectors |

## Mouse membrane genes and the corresponding GNF probesets

|                               |              |                 |                          |
|-------------------------------|--------------|-----------------|--------------------------|
| KIF3A                         | NM_008443    | gnf1m01346_a_at | Rab Regulators/Effectors |
| KIF3B                         | NM_008444    | gnf1m12845_at   | Rab Regulators/Effectors |
| KIF3C                         | NM_008445    | gnf1m01347_s_at | Rab Regulators/Effectors |
| Melanophilin/Slac2-A          | NM_053015    | gnf1m05777_at   | Rab Regulators/Effectors |
| MICAL-L1/MIRAB13              | Mm.196480    | gnf1m30015_a_at | Rab Regulators/Effectors |
| Myosin Va                     | NM_010864    | gnf1m02550_a_at | Rab Regulators/Effectors |
| Myosin VIIa                   | NM_008663    | gnf1m01473_a_at | Rab Regulators/Effectors |
| Myrip/Slac2-C/exophilin 8     | NM_144557    | gnf1m12748_at   | Rab Regulators/Effectors |
| MUNC13-1/UNC13A               | NM_021468    | gnf1m04107_a_at | Rab Regulators/Effectors |
| NICAL                         | NM_138315    | gnf1m06246_a_at | Rab Regulators/Effectors |
| NPC1                          | NM_008720    | gnf1m01512_a_at | Rab Regulators/Effectors |
| NPC2                          | NM_023409    | gnf1m04315_a_at | Rab Regulators/Effectors |
| OPTN/FIP2                     | NM_181848    | gnf1m00042_a_at | Rab Regulators/Effectors |
| PEX5R/PEX2                    | NM_021483    | gnf1m24799_at   | Rab Regulators/Effectors |
| p115/VDP                      | NM_019490    | gnf1m03714_a_at | Rab Regulators/Effectors |
| PIGR                          | NM_011082    | gnf1m02632_a_at | Rab Regulators/Effectors |
| PIN1                          | NM_023371    | gnf1m13075_at   | Rab Regulators/Effectors |
| PSEN1                         | NM_008943    | gnf1m01630_a_at | Rab Regulators/Effectors |
| Rabankyrin-5/ANKFY1           | NM_009671    | gnf1m02011_a_at | Rab Regulators/Effectors |
| Rabenosyn-5                   | NM_030081    | gnf1m09577_at   | Rab Regulators/Effectors |
| Rab11BP/WDR44/Rabphilin-11    | XM_135805    | gnf1m12649_at   | Rab Regulators/Effectors |
| Rab11FIP1/RCP                 | XM_134088    | gnf1m15328_s_at | Rab Regulators/Effectors |
| Rab11FIP2                     | XM_129331    | gnf1m29513_a_at | Rab Regulators/Effectors |
| Rab11FIP3/Eferin/Arfophilin-1 | XM_484616    | gnf1m09724_a_at | Rab Regulators/Effectors |
| Rab11FIP4/Arfophilin-2        | NM_175543    | gnf1m08360_at   | Rab Regulators/Effectors |
| Rab11FIP5/RIP1                | NM_001003955 | gnf1m09606_a_at | Rab Regulators/Effectors |
| Rab3GEP/MADD                  | NM_145527    | gnf1m06547_s_at | Rab Regulators/Effectors |
| Rab6ip1                       | NM_021494    | gnf1m15757_at   | Rab Regulators/Effectors |
| Rab6ip2/ERC1                  | NM_178085    | gnf1m05827_a_at | Rab Regulators/Effectors |
| Rab6KIFL                      | NM_009004    | gnf1m12921_at   | Rab Regulators/Effectors |
| Rab8IP/MAP4K2                 | NM_009006    | gnf1m24530_at   | Rab Regulators/Effectors |
| Rab9p40                       | NM_145522    | gnf1m14265_at   | Rab Regulators/Effectors |
| Rabep1/Rabaptin-5             | NM_019400    | gnf1m03668_a_at | Rab Regulators/Effectors |
| Rabep2/MP13                   | NM_030566    | gnf1m10670_a_at | Rab Regulators/Effectors |
| RabGEF1/Rabex-5               | NM_019983    | gnf1m10699_a_at | Rab Regulators/Effectors |
| RabGAP1/GAPCena               | NM_146121    | gnf1m09538_a_at | Rab Regulators/Effectors |
| RabGAP1 like                  | NM_013862    | gnf1m12026_a_at | Rab Regulators/Effectors |
| RabGGA                        | NM_019519    | gnf1m03723_a_at | Rab Regulators/Effectors |
| RabGGB                        | NM_011231    | gnf1m11107_a_at | Rab Regulators/Effectors |
| RabIF/MSS4                    | NM_145510    | gnf1m06540_a_at | Rab Regulators/Effectors |
| Rabin3/Rab3IP                 | NM_001003950 | gnf1m17532_a_at | Rab Regulators/Effectors |
| Rabin3 like 1/Rab3IL1         | NM_144538    | gnf1m06354_a_at | Rab Regulators/Effectors |
| RabIP4/RUFY1                  | NM_172557    | gnf1m07793_a_at | Rab Regulators/Effectors |
| Rabphilin-3A                  | NM_011286    | gnf1m02727_a_at | Rab Regulators/Effectors |
| Rabphilin-3A like/Noc2        | NM_029548    | gnf1m14863_at   | Rab Regulators/Effectors |
| Rabring7/ZFP364               | NM_026406    | gnf1m25876_a_at | Rab Regulators/Effectors |
| RAD51                         | NM_011234    | gnf1m11227_a_at | Rab Regulators/Effectors |
| RASA1                         | NM_145452    | gnf1m29253_at   | Rab Regulators/Effectors |
| RILP                          | XM_207763    | gnf1m31109_a_at | Rab Regulators/Effectors |
| RIM2                          | NM_053271    | gnf1m05859_s_at | Rab Regulators/Effectors |
| RIN1                          | NM_145495    | gnf1m06533_a_at | Rab Regulators/Effectors |
| RIN2                          | NM_028724    | gnf1m09224_s_at | Rab Regulators/Effectors |
| RIN3                          | NM_177620    | gnf1m08015_a_at | Rab Regulators/Effectors |
| RN-TRE/USP6NL                 | NM_181399    | gnf1m30960_at   | Rab Regulators/Effectors |
| RUTBC1                        | NM_197943    | gnf1m22384_at   | Rab Regulators/Effectors |
| RUTBC2                        | NM_172718    | gnf1m07674_at   | Rab Regulators/Effectors |
| RUTBC3                        | NM_134091    | gnf1m06145_a_at | Rab Regulators/Effectors |
| SEC15                         | NM_175353    | gnf1m00380_s_at | Rab Regulators/Effectors |
| SHH                           | NM_009170    | gnf1m18008_at   | Rab Regulators/Effectors |
| SYN1                          | NM_013680    | gnf1m03229_a_at | Rab Regulators/Effectors |
| Syntenin/SDCBP                | NM_016807    | gnf1m24624_a_at | Rab Regulators/Effectors |
| TBC1D8                        | NM_018775    | gnf1m03609_a_at | Rab Regulators/Effectors |
| TGN38/41                      | NM_009443    | gnf1m11452_at   | Rab Regulators/Effectors |
| TIP47/M6PRBP1                 | NM_025836    | gnf1m04722_x_at | Rab Regulators/Effectors |
| TRAPPC2                       | NM_025432    | gnf1m04533_a_at | Rab Regulators/Effectors |
| TRAPPC3                       | NM_013718    | gnf1m10545_a_at | Rab Regulators/Effectors |
| TRAPPC4                       | NM_021789    | gnf1m10914_a_at | Rab Regulators/Effectors |
| TRAPPC5                       | NM_025701    | gnf1m00451_a_at | Rab Regulators/Effectors |
| TRAPPC6B                      | NM_030057    | gnf1m27848_at   | Rab Regulators/Effectors |
| TSC2                          | NM_011647    | gnf1m02897_a_at | Rab Regulators/Effectors |
| USP6/TBC1D1                   | NM_019636    | gnf1m03754_a_at | Rab Regulators/Effectors |
| TBC1D4                        | NM_173380    | gnf1m25523_at   | Rab Regulators/Effectors |
| TBC1D5                        | NM_028162    | gnf1m31138_at   | Rab Regulators/Effectors |
| TBC1D13                       | NM_146252    | gnf1m06749_a_at | Rab Regulators/Effectors |
| TBC1D15                       | NM_025706    | gnf1m04652_a_at | Rab Regulators/Effectors |
| TBC1D17                       | NM_144924    | gnf1m22858_at   | Rab Regulators/Effectors |
| VPS9                          | NM_025709    | gnf1m29425_s_at | Rab Regulators/Effectors |
| YIF1A                         | NM_026553    | gnf1m10424_a_at | Rab Regulators/Effectors |
| YIP1B                         | NM_023784    | gnf1m11169_a_at | Rab Regulators/Effectors |
| YIP2A/REEP1                   | NM_178608    | gnf1m08315_a_at | Rab Regulators/Effectors |
| YIP2B/REEP3                   | NM_178606    | gnf1m00591_a_at | Rab Regulators/Effectors |
| YIP2C/REEP4                   | NM_180588    | gnf1m09888_a_at | Rab Regulators/Effectors |
| YIP2D/REEP2                   | NM_144865    | gnf1m06401_at   | Rab Regulators/Effectors |
| YIP2E/REEP5                   | NM_007874    | gnf1m00260_a_at | Rab Regulators/Effectors |
| YIP2F/REEP6                   | NM_139292    | gnf1m06324_a_at | Rab Regulators/Effectors |
| YIP3/PRA1/RABAC1              | NM_010261    | gnf1m29162_a_at | Rab Regulators/Effectors |
| YIP6A/PRA2/PRAF2              | NM_138602    | gnf1m09343_a_at | Rab Regulators/Effectors |
| YIP6B/PRA3/ARL6IP5            | NM_022992    | gnf1m04239_a_at | Rab Regulators/Effectors |
| XAPC7/PSMA7                   | NM_011969    | gnf1m03053_a_at | Rab Regulators/Effectors |
| ADCYAP1R1                     | NM_007407    | gnf1m12312_a_at | Rab Regulators/Effectors |
| ADRP/ADFP                     | NM_007408    | gnf1m11216_a_at | Rab Regulators/Effectors |
| MTMI                          | NM_019926    | gnf1m03846_a_at | Kinases & Phosphatases   |
| PIK3C2A                       | NM_011083    | gnf1m02633_a_at | Kinases & Phosphatases   |
| PIK3C2G                       | NM_207683    | gnf1m00014_a_at | Kinases & Phosphatases   |
| PIK3C3/VPS34                  | NM_181414    | gnf1m26213_a_at | Kinases & Phosphatases   |

## Mouse memrome genes and the corresponding GNF probesets

|                             |              |                 |                                    |
|-----------------------------|--------------|-----------------|------------------------------------|
| PIK3CB                      | NM_029094    | gnf1m12533_a_at | Kinases & Phosphatases             |
| PIK3CG                      | NM_020272    | gnf1m30362_a_at | Kinases & Phosphatases             |
| PIK3R1/p85 alpha            | NM_011085    | gnf1m30985_a_at | Kinases & Phosphatases             |
| PIK3R4/p150                 | XM_135116    | gnf1m28431_a_at | Kinases & Phosphatases             |
| PIK4CA                      | NM_001001983 | gnf1m30188_a_at | Kinases & Phosphatases             |
| PIPSK3/PIKfyve              | NM_011086    | gnf1m02634_a_at | Kinases & Phosphatases             |
| PIPSK1A/PIPSKI alpha        | NM_008846    | gnf1m01579_a_at | Kinases & Phosphatases             |
| PIPSK1B/PIPSKI beta         | NM_008847    | gnf1m28584_a_at | Kinases & Phosphatases             |
| PIPSK1C/PIPSKI gamma        | NM_008844    | gnf1m16290_a_at | Kinases & Phosphatases             |
| PKC lambda/tota             | NM_008857    | gnf1m01586_a_at | Kinases & Phosphatases             |
| PKC zeta                    | NM_008860    | gnf1m27167_at   | Kinases & Phosphatases             |
| PDE6D/PDED                  | NM_008801    | gnf1m10577_a_at | Kinases & Phosphatases             |
| PKC alpha                   | NM_011101    | gnf1m02640_a_at | Kinases & Phosphatases             |
| PKC beta 1                  | NM_008855    | gnf1m01585_a_at | Kinases & Phosphatases             |
| PKA catalytic alpha         | NM_008854    | gnf1m01584_at   | Kinases & Phosphatases             |
| PRKAR2A                     | NM_008924    | gnf1m15156_at   | Kinases & Phosphatases             |
| PLK1                        | NM_011121    | gnf1m02651_a_at | Kinases & Phosphatases             |
| CDC2A                       | NM_007659    | gnf1m11538_at   | Kinases & Phosphatases             |
| ALK                         | NM_007439    | gnf1m00802_a_at | Kinases & Phosphatases             |
| PYK2/PTK2B                  | NM_172498    | gnf1m09552_a_at | Kinases & Phosphatases             |
| Bet1 like                   | NM_018742    | gnf1m00117_a_at | SNARES                             |
| GOSR1                       | NM_016810    | gnf1m00251_a_at | SNARES                             |
| GOSR2                       | NM_019650    | gnf1m03759_a_at | SNARES                             |
| NAPa                        | NM_025898    | gnf1m04750_a_at | SNARES                             |
| NAPb                        | NM_019632    | gnf1m29857_a_at | SNARES                             |
| NAPg                        | XM_355095    | gnf1m16212_a_at | SNARES                             |
| SEC22 like 1                | NM_011342    | gnf1m12140_at   | SNARES                             |
| SEC22 like 2                | NM_133704    | gnf1m12630_at   | SNARES                             |
| SEC22 like 3                | NM_178677    | gnf1m11511_a_at | SNARES                             |
| SNAP-23                     | NM_009222    | gnf1m00480_a_at | SNARES                             |
| SNAP-25                     | NM_011428    | gnf1m02804_a_at | SNARES                             |
| SNAP-29                     | NM_023348    | gnf1m00741_a_at | SNARES                             |
| Syntaxin 1A                 | NM_016801    | gnf1m03483_a_at | SNARES                             |
| Syntaxin 1B                 | NM_024414    | gnf1m04430_s_at | SNARES                             |
| Syntaxin 1B like            | NM_019560    | gnf1m03734_at   | SNARES                             |
| Syntaxin 2                  | NM_007941    | gnf1m01078_a_at | SNARES                             |
| Syntaxin 3                  | NM_011502    | gnf1m30040_a_at | SNARES                             |
| Syntaxin 4A                 | NM_009294    | gnf1m10627_a_at | SNARES                             |
| Syntaxin 5A                 | NM_019829    | gnf1m00119_a_at | SNARES                             |
| Syntaxin 6                  | NM_021433    | gnf1m00598_a_at | SNARES                             |
| Syntaxin 7                  | NM_016797    | gnf1m12682_at   | SNARES                             |
| Syntaxin 11                 | XM_203312    | gnf1m17339_at   | SNARES                             |
| Syntaxin 12                 | NM_133887    | gnf1m30802_a_at | SNARES                             |
| Syntaxin 16                 | NM_172675    | gnf1m09223_s_at | SNARES                             |
| Syntaxin 18                 | NM_026959    | gnf1m05094_a_at | SNARES                             |
| VAMP1/Synaptobrevin         | NM_009496    | gnf1m11767_a_at | SNARES                             |
| VAMP2                       | NM_009497    | gnf1m28549_at   | SNARES                             |
| VAMP3                       | NM_009498    | gnf1m12863_at   | SNARES                             |
| VAMP4                       | NM_016796    | gnf1m11695_at   | SNARES                             |
| VAMP5                       | NM_016872    | gnf1m03504_a_at | SNARES                             |
| VtiA                        | NM_016862    | gnf1m03495_a_at | SNARES                             |
| VtiB                        | NM_016800    | gnf1m10920_a_at | SNARES                             |
| CPLX1                       | NM_007756    | gnf1m00666_at   | SNARE Regulators/Effectors         |
| CPLX2                       | NM_009946    | gnf1m02144_a_at | SNARE Regulators/Effectors         |
| GATE-16/GABARAPL2           | NM_026693    | gnf1m07661_s_at | SNARE Regulators/Effectors         |
| LAMA1                       | NM_008480    | gnf1m01370_a_at | SNARE Regulators/Effectors         |
| LAMA2                       | NM_008481    | gnf1m00580_a_at | SNARE Regulators/Effectors         |
| LAMA3                       | XM_140451    | gnf1m30945_a_at | SNARE Regulators/Effectors         |
| LAMA4                       | NM_010681    | gnf1m16076_a_at | SNARE Regulators/Effectors         |
| LAMA5                       | XM_203796    | gnf1m16712_a_at | SNARE Regulators/Effectors         |
| NSF                         | NM_008740    | gnf1m00368_a_at | SNARE Regulators/Effectors         |
| Synaptotagmin I             | NM_009306    | gnf1m01819_a_at | SNARE Regulators/Effectors         |
| Synaptotagmin I like/Slp1   | NM_031393    | gnf1m10576_a_at | SNARE Regulators/Effectors         |
| Synaptotagmin II            | NM_009307    | gnf1m12061_at   | SNARE Regulators/Effectors         |
| Synaptotagmin II like/Slp2  | NM_031394    | gnf1m05672_a_at | SNARE Regulators/Effectors         |
| Synaptotagmin III           | NM_016663    | gnf1m03415_a_at | SNARE Regulators/Effectors         |
| Synaptotagmin III like/Slp3 | NM_031395    | gnf1m05673_a_at | SNARE Regulators/Effectors         |
| Synaptotagmin IV            | NM_009308    | gnf1m00351_s_at | SNARE Regulators/Effectors         |
| Synaptotagmin IV like/Slp4  | NM_013757    | gnf1m03272_a_at | SNARE Regulators/Effectors         |
| Synaptotagmin V             | NM_016908    | gnf1m03520_a_at | SNARE Regulators/Effectors         |
| Synaptotagmin VI            | NM_018800    | gnf1m12384_a_at | SNARE Regulators/Effectors         |
| Synaptotagmin VII           | NM_018801    | gnf1m11012_a_at | SNARE Regulators/Effectors         |
| Synaptotagmin VIII          | NM_018802    | gnf1m11144_a_at | SNARE Regulators/Effectors         |
| Synaptotagmin IX            | NM_021889    | gnf1m13176_at   | SNARE Regulators/Effectors         |
| Synaptotagmin X             | NM_018803    | gnf1m03626_a_at | SNARE Regulators/Effectors         |
| Synaptotagmin XI            | NM_018804    | gnf1m03627_a_at | SNARE Regulators/Effectors         |
| Synaptotagmin XII           | NM_134164    | gnf1m12742_at   | SNARE Regulators/Effectors         |
| Synaptotagmin XIII          | NM_030725    | gnf1m12625_a_at | SNARE Regulators/Effectors         |
| Synaptotagmin XIV           | NM_181546    | gnf1m27384_at   | SNARE Regulators/Effectors         |
| Synaptotagmin XIV like      | NM_172804    | gnf1m08028_a_at | SNARE Regulators/Effectors         |
| Synaptotagmin XV            | NM_181529    | gnf1m08551_at   | SNARE Regulators/Effectors         |
| STXBP1/Munc18-1             | NM_009295    | gnf1m11024_a_at | SNARE Regulators/Effectors         |
| STXBP2/Munc18-2             | NM_011503    | gnf1m10594_a_at | SNARE Regulators/Effectors         |
| STXBP3/Munc18-3             | NM_011504    | gnf1m02835_a_at | SNARE Regulators/Effectors         |
| STXBP4/SYNIIP               | NM_011505    | gnf1m02836_a_at | SNARE Regulators/Effectors         |
| STXBP5/LLGL3                | NM_030191    | gnf1m13857_at   | SNARE Regulators/Effectors         |
| STXBP5 like/LLGL4           | NM_172440    | gnf1m11980_a_at | SNARE Regulators/Effectors         |
| Syntaxillin                 | NM_198214    | gnf1m24371_a_at | SNARE Regulators/Effectors         |
| VPS33A                      | NM_029929    | gnf1m09300_a_at | SNARE Regulators/Effectors         |
| VPS33B                      | NM_178070    | gnf1m01275_a_at | SNARE Regulators/Effectors         |
| VPS39/mVAMP6                | NM_147153    | gnf1m31187_a_at | SNARE Regulators/Effectors         |
| VPS45                       | NM_013841    | gnf1m03317_a_at | SNARE Regulators/Effectors         |
| ANT1/SLC25A4                | XM_134169    | gnf1m28937_a_at | Coat Adaptors/Regulators/Effectors |
| API beta 1                  | NM_007454    | gnf1m11939_a_at | Coat Adaptors/Regulators/Effectors |
| API gamma 1                 | NM_009677    | gnf1m25131_a_at | Coat Adaptors/Regulators/Effectors |



## Mouse membrane genes and the corresponding GNF probesets

|                         |              |                  |                                    |
|-------------------------|--------------|------------------|------------------------------------|
| API mu 1                | NM_007456    | gnf1m00812_a_at  | Coat Adaptors/Regulators/Effectors |
| API mu 2                | NM_009678    | gnf1m26951_at    | Coat Adaptors/Regulators/Effectors |
| API sigma 1             | NM_007457    | gnf1m00813_a_at  | Coat Adaptors/Regulators/Effectors |
| API sigma 2             | NM_026887    | gnf1m07790_a_at  | Coat Adaptors/Regulators/Effectors |
| API sigma 3             | NM_183027    | gnf1m19124_at    | Coat Adaptors/Regulators/Effectors |
| AP2 alpha 1             | NM_007458    | gnf1m00814_a_at  | Coat Adaptors/Regulators/Effectors |
| AP2 beta 1              | NM_027915    | gnf1m24443_at    | Coat Adaptors/Regulators/Effectors |
| AP2 mu 1                | NM_009679    | gnf1m02016_a_at  | Coat Adaptors/Regulators/Effectors |
| AP2 sigma 1             | NM_198613    | gnf1m29055_at    | Coat Adaptors/Regulators/Effectors |
| AP3 beta 1              | NM_009680    | gnf1m02017_a_at  | Coat Adaptors/Regulators/Effectors |
| AP3 beta 2              | NM_021492    | gnf1m06731_at    | Coat Adaptors/Regulators/Effectors |
| AP3 delta 1             | NM_007460    | gnf1m00816_a_at  | Coat Adaptors/Regulators/Effectors |
| AP3 mu 1                | NM_018829    | gnf1m03640_at    | Coat Adaptors/Regulators/Effectors |
| AP3 mu 2                | NM_029505    | gnf1m05469_a_at  | Coat Adaptors/Regulators/Effectors |
| AP3 sigma 1             | NM_009681    | gnf1m10940_a_at  | Coat Adaptors/Regulators/Effectors |
| AP4 beta 1              | NM_026193    | gnf1m03719_at    | Coat Adaptors/Regulators/Effectors |
| AP4 epsilon 1           | XM_485064    | gnf1m19922_a_at  | Coat Adaptors/Regulators/Effectors |
| AP4 mu 1                | NM_021392    | gnf1m07463_a_at  | Coat Adaptors/Regulators/Effectors |
| AP4 sigma 1             | NM_021710    | gnf1m04154_a_at  | Coat Adaptors/Regulators/Effectors |
| ARAP3                   | NM_139206    | gnf1m00120_a_at  | Coat Adaptors/Regulators/Effectors |
| ARF1                    | NM_007476    | gnf1m09430_s_at  | Coat Adaptors/Regulators/Effectors |
| ARF2                    | NM_007477    | gnf1m13018_a_at  | Coat Adaptors/Regulators/Effectors |
| ARF3                    | NM_007478    | gnf1m00484_a_at  | Coat Adaptors/Regulators/Effectors |
| ARF4                    | NM_007479    | gnf1m12572_at    | Coat Adaptors/Regulators/Effectors |
| ARF5                    | NM_007480    | gnf1m00827_a_at  | Coat Adaptors/Regulators/Effectors |
| ARF6                    | NM_007481    | gnf1m00828_a_at  | Coat Adaptors/Regulators/Effectors |
| ARFIP1/Arfaptin         | XM_130985    | gnf1m29561_a_at  | Coat Adaptors/Regulators/Effectors |
| ARFIP2/POR1             | NM_029802    | gnf1m10119_at    | Coat Adaptors/Regulators/Effectors |
| ARFRP1                  | NM_029702    | gnf1m10166_a_at  | Coat Adaptors/Regulators/Effectors |
| ARFRP2                  | NM_172595    | gnf1m12909_a_at  | Coat Adaptors/Regulators/Effectors |
| ARFGAP1                 | NM_145760    | gnf1m10352_a_at  | Coat Adaptors/Regulators/Effectors |
| ARFGAP3                 | NM_025445    | gnf1m04539_a_at  | Coat Adaptors/Regulators/Effectors |
| GIT1/p95-APP1           | NM_001004144 | gnf1m30819_at    | Coat Adaptors/Regulators/Effectors |
| ARL1                    | NM_025859    | gnf1m04734_a_at  | Coat Adaptors/Regulators/Effectors |
| ARL10A                  | NM_019968    | gnf1m03871_a_at  | Coat Adaptors/Regulators/Effectors |
| ARL10B                  | NM_026823    | gnf1m05072_a_at  | Coat Adaptors/Regulators/Effectors |
| ARL10C                  | NM_026011    | gnf1m00159_a_at  | Coat Adaptors/Regulators/Effectors |
| ARL2                    | NM_019722    | gnf1m11232_a_at  | Coat Adaptors/Regulators/Effectors |
| ARL3                    | NM_019718    | gnf1m12598_a_at  | Coat Adaptors/Regulators/Effectors |
| ARL4                    | NM_007487    | gnf1m00051_a_at  | Coat Adaptors/Regulators/Effectors |
| ARF4L/ARL5              | NM_031160    | gnf1m05622_at    | Coat Adaptors/Regulators/Effectors |
| ARL6                    | NM_019665    | gnf1m06838_at    | Coat Adaptors/Regulators/Effectors |
| ARL7                    | NM_177305    | gnf1m12388_at    | Coat Adaptors/Regulators/Effectors |
| ARL8                    | NM_029466    | gnf1m13061_a_at  | Coat Adaptors/Regulators/Effectors |
| ARL11                   | NM_177337    | gnf1m08455_a_at  | Coat Adaptors/Regulators/Effectors |
| ARL13                   | XM_136037    | gnf1m14530_a_at  | Coat Adaptors/Regulators/Effectors |
| ARL2BP                  | NM_024191    | gnf1m10778_a_at  | Coat Adaptors/Regulators/Effectors |
| Arl6IP                  | NM_019419    | gnf1m16295_a_at  | Coat Adaptors/Regulators/Effectors |
| Arl6IP2                 | NM_019717    | gnf1m11762_at    | Coat Adaptors/Regulators/Effectors |
| Arl6IP4                 | NM_144509    | gnf1m06339_a_at  | Coat Adaptors/Regulators/Effectors |
| ARR3                    | NM_133205    | gnf1m10693_a_at  | Coat Adaptors/Regulators/Effectors |
| ARRB1/Arrestin beta 1   | NM_177231    | gnf1m13229_a_at  | Coat Adaptors/Regulators/Effectors |
| BIG1/ArfGEF1            | XM_129376    | gnf1m28800_a_at  | Coat Adaptors/Regulators/Effectors |
| BIG2/ArfGEF2            | XM_130646    | gnf1m29596_a_at  | Coat Adaptors/Regulators/Effectors |
| CAV1                    | NM_007616    | gnf1m13227_a_at  | Coat Adaptors/Regulators/Effectors |
| CAV2                    | NM_016900    | gnf1m09288_a_at  | Coat Adaptors/Regulators/Effectors |
| CAV3                    | NM_007617    | gnf1m10774_a_at  | Coat Adaptors/Regulators/Effectors |
| Centaurin alpha 1       | NM_172723    | gnf1m11465_a_at  | Coat Adaptors/Regulators/Effectors |
| Centaurin alpha 2       | NM_172133    | gnf1m29754_at    | Coat Adaptors/Regulators/Effectors |
| Centaurin beta 1/ACAP1  | NM_153788    | gnf1m10830_a_at  | Coat Adaptors/Regulators/Effectors |
| Centaurin beta 2/ACAP2  | XM_193836    | gnf1m30472_a_at  | Coat Adaptors/Regulators/Effectors |
| Centaurin beta 5        | NM_207223    | gnf1m20632_a_at  | Coat Adaptors/Regulators/Effectors |
| Centaurin delta 1       | XM_132099    | gnf1m09519_a_at  | Coat Adaptors/Regulators/Effectors |
| Centaurin delta 2/ARAP1 | NM_027180    | gnf1m10341_a_at  | Coat Adaptors/Regulators/Effectors |
| Centaurin gamma 2/AGAP1 | NM_178119    | gnf1m12478_a_at  | Coat Adaptors/Regulators/Effectors |
| CHRM3                   | NM_033269    | gnf1m12489_at    | Coat Adaptors/Regulators/Effectors |
| CLTA                    | NM_016760    | gnf1m03463_a_at  | Coat Adaptors/Regulators/Effectors |
| CLTB                    | NM_028870    | gnf1m10230_a_at  | Coat Adaptors/Regulators/Effectors |
| CLTC                    | NM_001003908 | gnf1m29200_a_at  | Coat Adaptors/Regulators/Effectors |
| COP alpha               | NM_009938    | gnf1m00475_a_at  | Coat Adaptors/Regulators/Effectors |
| COP beta 1              | NM_033370    | gnf1m095735_a_at | Coat Adaptors/Regulators/Effectors |
| COP beta 2              | NM_015827    | gnf1m00188_a_at  | Coat Adaptors/Regulators/Effectors |
| COP epsilon             | NM_021538    | gnf1m04139_a_at  | Coat Adaptors/Regulators/Effectors |
| COP gamma 1             | NM_017477    | gnf1m03579_a_at  | Coat Adaptors/Regulators/Effectors |
| COP gamma 2             | NM_017478    | gnf1m03580_a_at  | Coat Adaptors/Regulators/Effectors |
| COP zeta 1              | NM_019817    | gnf1m10763_a_at  | Coat Adaptors/Regulators/Effectors |
| COP zeta 2              | NM_019877    | gnf1m03833_a_at  | Coat Adaptors/Regulators/Effectors |
| CPE                     | NM_013494    | gnf1m03121_a_at  | Coat Adaptors/Regulators/Effectors |
| DDEF1/ASAP1             | NM_010026    | gnf1m16925_a_at  | Coat Adaptors/Regulators/Effectors |
| DDEF2/GMS92             | NM_001004364 | gnf1m15323_at    | Coat Adaptors/Regulators/Effectors |
| DNMBP                   | NM_028029    | gnf1m14429_at    | Coat Adaptors/Regulators/Effectors |
| Dynamin I               | NM_010065    | gnf1m15175_a_at  | Coat Adaptors/Regulators/Effectors |
| Dynamin I like          | NM_152816    | gnf1m00296_s_at  | Coat Adaptors/Regulators/Effectors |
| Dynamin II              | NM_007871    | gnf1m01038_a_at  | Coat Adaptors/Regulators/Effectors |
| EGFR                    | NM_007912    | gnf1m17332_at    | Coat Adaptors/Regulators/Effectors |
| EPSIN 1                 | NM_010147    | gnf1m16336_at    | Coat Adaptors/Regulators/Effectors |
| EPSIN 2                 | NM_010148    | gnf1m25120_at    | Coat Adaptors/Regulators/Effectors |
| EPSIN 3                 | NM_027984    | gnf1m09239_a_at  | Coat Adaptors/Regulators/Effectors |
| FAPP1/PLEKHA3           | NM_031256    | gnf1m10825_a_at  | Coat Adaptors/Regulators/Effectors |
| FAPP2                   | NM_001001335 | gnf1m21754_at    | Coat Adaptors/Regulators/Effectors |
| FBXO8                   | NM_015791    | gnf1m11512_at    | Coat Adaptors/Regulators/Effectors |
| GBF1                    | NM_178930    | gnf1m30146_a_at  | Coat Adaptors/Regulators/Effectors |
| GGA1                    | NM_145929    | gnf1m06641_a_at  | Coat Adaptors/Regulators/Effectors |
| GGA2                    | XM_133801    | gnf1m16281_a_at  | Coat Adaptors/Regulators/Effectors |
| GGA3                    | NM_173048    | gnf1m29064_a_at  | Coat Adaptors/Regulators/Effectors |

## Mouse membrane genes and the corresponding GNF probesets

|                             |           |                 |                                    |
|-----------------------------|-----------|-----------------|------------------------------------|
| GIT2                        | NM_019834 | gnf1m03824_a_at | Coat Adaptors/Regulators/Effectors |
| HTR2A                       | NM_172812 | gnf1m13020_a_at | Coat Adaptors/Regulators/Effectors |
| HRB                         | NM_010472 | gnf1m27015_a_at | Coat Adaptors/Regulators/Effectors |
| HRB like                    | NM_145566 | gnf1m06569_at   | Coat Adaptors/Regulators/Effectors |
| HRG4/UNC119                 | NM_011676 | gnf1m10518_a_at | Coat Adaptors/Regulators/Effectors |
| HRS/HGS                     | NM_008244 | gnf1m12468_a_at | Coat Adaptors/Regulators/Effectors |
| DNJC6/Auxilin/HSP40 homolog | NM_198412 | gnf1m29508_s_at | Coat Adaptors/Regulators/Effectors |
| KIF23/MKLP1                 | NM_024245 | gnf1m24038_a_at | Coat Adaptors/Regulators/Effectors |
| LHCGR                       | NM_013582 | gnf1m23901_at   | Coat Adaptors/Regulators/Effectors |
| MINT1/APBA1                 | NM_177034 | gnf1m08017_a_at | Coat Adaptors/Regulators/Effectors |
| MINT2/APBA2                 | NM_007461 | gnf1m30696_a_at | Coat Adaptors/Regulators/Effectors |
| p24/RNP24                   | NM_019770 | gnf1m22837_a_at | Coat Adaptors/Regulators/Effectors |
| PLD1                        | NM_008875 | gnf1m29611_at   | Coat Adaptors/Regulators/Effectors |
| PLD2                        | NM_008876 | gnf1m01596_a_at | Coat Adaptors/Regulators/Effectors |
| PRKCABP                     | NM_008837 | gnf1m28546_at   | Coat Adaptors/Regulators/Effectors |
| PSCD1                       | NM_011180 | gnf1m00227_at   | Coat Adaptors/Regulators/Effectors |
| PSCD2/ARNO                  | NM_011181 | gnf1m12440_a_at | Coat Adaptors/Regulators/Effectors |
| PSCD3/GRP1                  | NM_011182 | gnf1m10888_a_at | Coat Adaptors/Regulators/Effectors |
| RANBP2                      | NM_011240 | gnf1m02708_a_at | Coat Adaptors/Regulators/Effectors |
| RGS2                        | NM_009061 | gnf1m23640_at   | Coat Adaptors/Regulators/Effectors |
| RGS4                        | NM_009062 | gnf1m00602_at   | Coat Adaptors/Regulators/Effectors |
| RP2                         | NM_133669 | gnf1m23771_a_at | Coat Adaptors/Regulators/Effectors |
| TBCD                        | NM_029878 | gnf1m12768_a_at | Coat Adaptors/Regulators/Effectors |
| SARIA                       | NM_009120 | gnf1m01718_a_at | Coat Adaptors/Regulators/Effectors |
| SAR1B                       | NM_025535 | gnf1m04580_a_at | Coat Adaptors/Regulators/Effectors |
| SCOC                        | NM_019708 | gnf1m03784_s_at | Coat Adaptors/Regulators/Effectors |
| SEC10LI/EXOC5               | NM_207214 | gnf1m19641_at   | Coat Adaptors/Regulators/Effectors |
| SEC12                       | NM_016703 | gnf1m04023_a_at | Coat Adaptors/Regulators/Effectors |
| SEC13 like 1/SEC13R         | NM_024206 | gnf1m04398_a_at | Coat Adaptors/Regulators/Effectors |
| SEC13 like/SEH1             | NM_028112 | gnf1m05269_at   | Coat Adaptors/Regulators/Effectors |
| SEC31 like 1/SEC31A         | NM_132230 | gnf1m15374_a_at | Coat Adaptors/Regulators/Effectors |
| SEC23B                      | NM_019787 | gnf1m11351_a_at | Coat Adaptors/Regulators/Effectors |
| SEC23IP                     | NM_133737 | gnf1m29548_a_at | Coat Adaptors/Regulators/Effectors |
| SEC24A                      | NM_175255 | gnf1m11411_a_at | Coat Adaptors/Regulators/Effectors |
| SEC24B                      | NM_207209 | gnf1m13723_at   | Coat Adaptors/Regulators/Effectors |
| SEC24C                      | NM_172596 | gnf1m09427_a_at | Coat Adaptors/Regulators/Effectors |
| SEC24D                      | NM_027135 | gnf1m09521_a_at | Coat Adaptors/Regulators/Effectors |
| SMAPI                       | NM_028534 | gnf1m00202_a_at | Coat Adaptors/Regulators/Effectors |
| SRPRB                       | NM_009275 | gnf1m00716_a_at | Coat Adaptors/Regulators/Effectors |
| STAM1                       | NM_011484 | gnf1m02828_a_at | Coat Adaptors/Regulators/Effectors |
| STAM2                       | NM_019667 | gnf1m12025_a_at | Coat Adaptors/Regulators/Effectors |
| STONIN 1                    | NM_029858 | gnf1m23820_a_at | Coat Adaptors/Regulators/Effectors |
| p23/TMP21                   | NM_026775 | gnf1m15377_at   | Coat Adaptors/Regulators/Effectors |
| VPS11                       | NM_027889 | gnf1m31090_a_at | Coat Adaptors/Regulators/Effectors |
| VPS16                       | NM_030559 | gnf1m00492_a_at | Coat Adaptors/Regulators/Effectors |
| VPS26                       | NM_133672 | gnf1m09388_a_at | Coat Adaptors/Regulators/Effectors |
| VPS4A                       | NM_126165 | gnf1m10507_a_at | Coat Adaptors/Regulators/Effectors |
| ZFP219                      | NM_027248 | gnf1m00759_a_at | Coat Adaptors/Regulators/Effectors |
| ZFP410                      | NM_144833 | gnf1m27013_at   | Coat Adaptors/Regulators/Effectors |
